# Supplementary material for: Investigations into Chemical Components from Monascus purpureus with Photoprotective and Anti-Melanogenic Activities
Source: MDPI journal article supplement (doi:10.3390/jof7080619), 2021-07-29
Supplement: s1 [file s1]

# Investigations into chemical components from *Monascus purpureus* with photoprotective and anti-melanogenic activities

Ho-Cheng Wu<sup>1,2</sup>, Yih-Fung Chen<sup>1,2,3</sup>, Ming-Jen Cheng<sup>4</sup>, Ming-Der Wu<sup>4</sup>, Yen-Lin Chen<sup>4</sup> and Hsun-Shuo Chang<sup>1,2,3,\*</sup>

<sup>1</sup> Graduate Institute of Natural Products, College of Pharmacy, Kaohsiung Medical University, Kaohsiung 807, Taiwan; duncanwu762001@gmail.com (H.-C.W.); yihfungchen@kmu.edu.tw (Y.-F.C.)

<sup>2</sup> School of Pharmacy, College of Pharmacy, Kaohsiung Medical University, Kaohsiung 807, Taiwan

<sup>3</sup> Department of Medical Research, Kaohsiung Medical University Hospital, Kaohsiung 807, Taiwan

<sup>4</sup> Bioresource Collection and Research Center (BCRC), Food Industry Research and Development Institute (FIRDI), Hsinchu 300, Taiwan; cmj@firdi.org.tw (M.-J.C.); wmd@firdi.org.tw (M.-D.W.); alc@firdi.org.tw (Y.-L.C.)

\* Correspondence: hschang@kmu.edu.tw; Tel: +886-7312-1101 ext. 2664; Fax: +886-7321-0683 (H.-S.C.)

## Appendix A. Supplementary data

|                                                                                                                                   |    |
|-----------------------------------------------------------------------------------------------------------------------------------|----|
| Figure S1. <sup>1</sup> H NMR spectrum of 5 <i>S</i> ,6 <i>S</i> -monasporpyridine A (1) in CD <sub>3</sub> OD at 600 MHz .....   | 4  |
| Figure S2. <sup>13</sup> C NMR spectrum of 5 <i>S</i> ,6 <i>S</i> -monasporpyridine A (1) in CD <sub>3</sub> OD at 125 MHz .....  | 4  |
| Figure S3. DEPT spectrum of 5 <i>S</i> ,6 <i>S</i> -monasporpyridine A (1).....                                                   | 5  |
| Figure S4. COSY spectrum of 5 <i>S</i> ,6 <i>S</i> -monasporpyridine A (1) .....                                                  | 5  |
| Figure S5. HMBC spectrum of 5 <i>S</i> ,6 <i>S</i> -monasporpyridine A (1) .....                                                  | 6  |
| Figure S6. NOESY spectrum of 5 <i>S</i> ,6 <i>S</i> -monasporpyridine A (1) .....                                                 | 6  |
| Figure S7. HRESIMS spectrum of 5 <i>S</i> ,6 <i>S</i> -monasporpyridine A (1).....                                                | 7  |
| Figure S8. CD spectrum of 5 <i>S</i> ,6 <i>S</i> -monasporpyridine A (1).....                                                     | 7  |
| Figure S9. <sup>1</sup> H NMR spectrum of 5 <i>R</i> ,6 <i>R</i> -monasporpyridine A (2) in CD <sub>3</sub> OD at 600 MHz .....   | 8  |
| Figure S10. <sup>13</sup> C NMR spectrum of 5 <i>R</i> ,6 <i>R</i> -monasporpyridine A (2) in CD <sub>3</sub> OD at 125 MHz ..... | 8  |
| Figure S11. DEPT spectrum of 5 <i>R</i> ,6 <i>R</i> -monasporpyridine A (2).....                                                  | 9  |
| Figure S12. COSY spectrum of 5 <i>R</i> ,6 <i>R</i> -monasporpyridine A (2) .....                                                 | 9  |
| Figure S13. HMBC spectrum of 5 <i>R</i> ,6 <i>R</i> -monasporpyridine A (2).....                                                  | 10 |
| Figure S14. NOESY spectrum of 5 <i>R</i> ,6 <i>R</i> - monasporpyridine A (2) .....                                               | 10 |
| Figure S15. HRESIMS spectrum of 5 <i>R</i> ,6 <i>R</i> -monasporpyridine A (2) .....                                              | 11 |
| Figure S16. CD spectrum of 5 <i>R</i> ,6 <i>R</i> -monasporpyridine A (2) .....                                                   | 11 |
| Figure S17. <sup>1</sup> H NMR spectrum of monasxanthone A (3) in CDCl <sub>3</sub> at 600 MHz .....                              | 12 |
| Figure S18. <sup>13</sup> C NMR spectrum of monasxanthone A (3) in CDCl <sub>3</sub> at 125 MHz.....                              | 12 |
| Figure S19. DEPT spectrum of monasxanthone A (3) .....                                                                            | 13 |
| Figure S20. COSY spectrum of monasxanthone A (3).....                                                                             | 13 |
| Figure S21. HMBC spectrum of monasxanthone A (3) .....                                                                            | 14 |
| Figure S22. NOESY spectrum of monasxanthone A (3) .....                                                                           | 14 |
| Figure S23. HRESIMS spectrum of monasxanthone A (3).....                                                                          | 15 |
| Figure S24. <sup>1</sup> H NMR spectrum of monasxanthone B (4) in CDCl <sub>3</sub> at 600 MHz .....                              | 15 |
| Figure S25. <sup>13</sup> C NMR spectrum of monasxanthone B (4) in CDCl <sub>3</sub> at 125 MHz .....                             | 16 |
| Figure S26. DEPT spectrum of monasxanthone B (4).....                                                                             | 16 |
| Figure S27. COSY spectrum of monasxanthone B (4).....                                                                             | 17 |
| Figure S28. HMBC spectrum of monasxanthone B (4).....                                                                             | 17 |
| Figure S29. NOESY spectrum of monasxanthone B (4).....                                                                            | 18 |
| Figure S30. HRESIMS spectrum of monasxanthone B (4).....                                                                          | 18 |
| Figure S31. <sup>1</sup> H NMR spectrum of monasnaphthalenone (5) in acetone- <i>d</i> <sub>6</sub> at 600 MHz .....              | 19 |

|                                                                                                 |    |
|-------------------------------------------------------------------------------------------------|----|
| Figure S32. $^{13}\text{C}$ NMR spectrum of monasnaphthalenone (5) in acetone- $d_6$ at 125 MHz | 19 |
| .....                                                                                           |    |
| Figure S33. COSY spectrum of monasnaphthalenone (5) .....                                       | 20 |
| Figure S34. HMBC spectrum of monasnaphthalenone (5) .....                                       | 20 |
| Figure S35. NOESY spectrum of monasnaphthalenone (5) .....                                      | 21 |
| Figure S36. HRESIMS spectrum of monasnaphthalenone (5) .....                                    | 21 |
| Figure S37. $^1\text{H}$ NMR spectrum of monapurpurin (6) in acetone- $d_6$ at 600 MHz.....     | 22 |
| Figure S38. $^{13}\text{C}$ NMR spectrum of monapurpurin (6) in acetone- $d_6$ at 125 MHz.....  | 22 |
| Figure S39. COSY spectrum of monapurpurin (6) .....                                             | 23 |
| Figure S40. HMBC spectrum of monapurpurin (6) .....                                             | 23 |
| Figure S41. NOESY spectrum of monapurpurin (6) .....                                            | 24 |
| Figure S42. HRESIMS spectrum of monapurpurin (6) .....                                          | 24 |

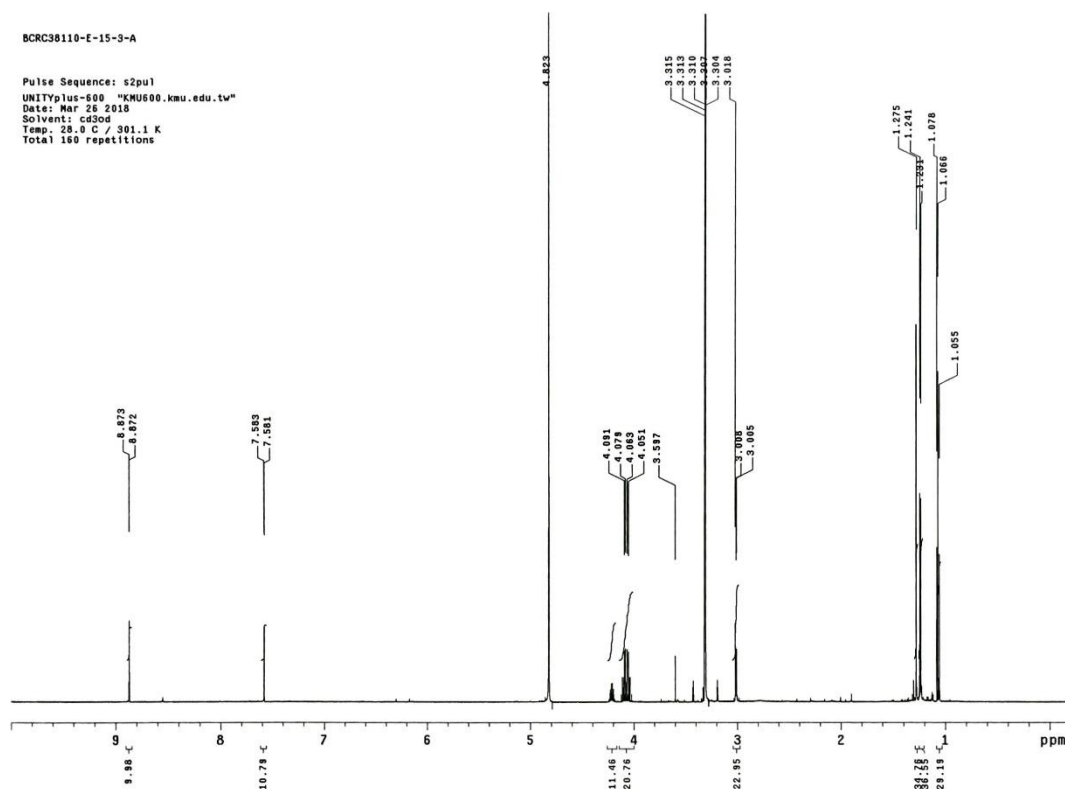

Figure S1.  $^1\text{H}$  NMR spectrum of 5S,6S-monaspurpyridine A (**1**) in  $\text{CD}_3\text{OD}$  at 600 MHz

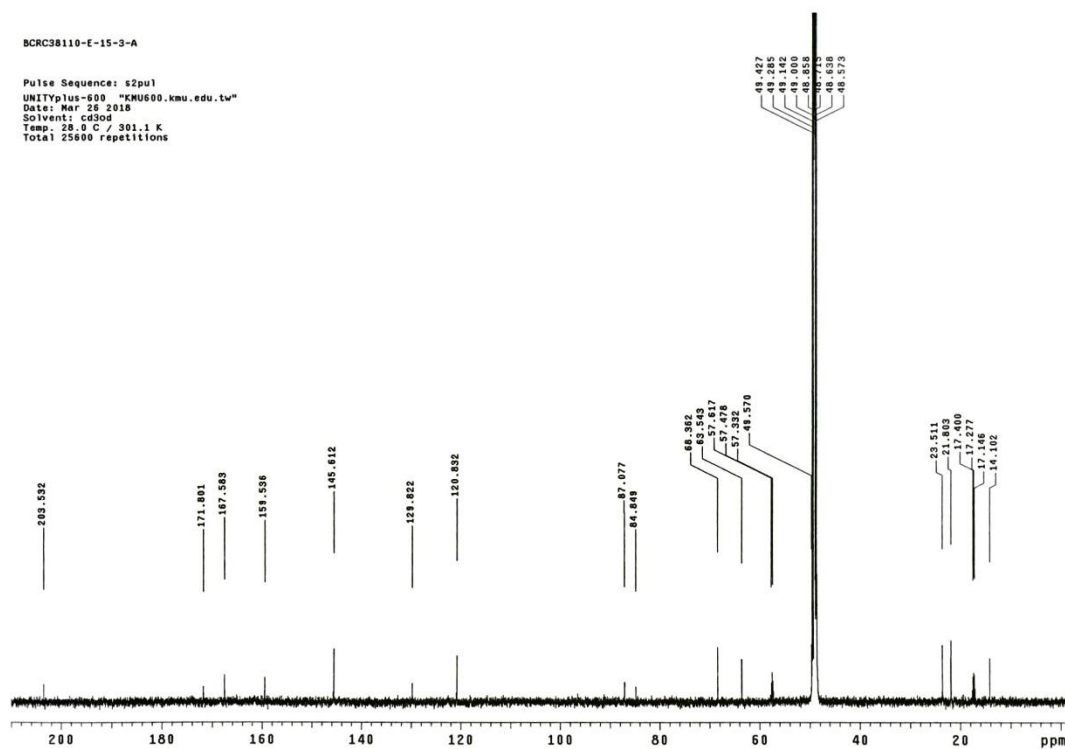

Figure S2.  $^{13}\text{C}$  NMR spectrum of 5S,6S-monaspurpyridine A (**1**) in  $\text{CD}_3\text{OD}$  at 125 MHz

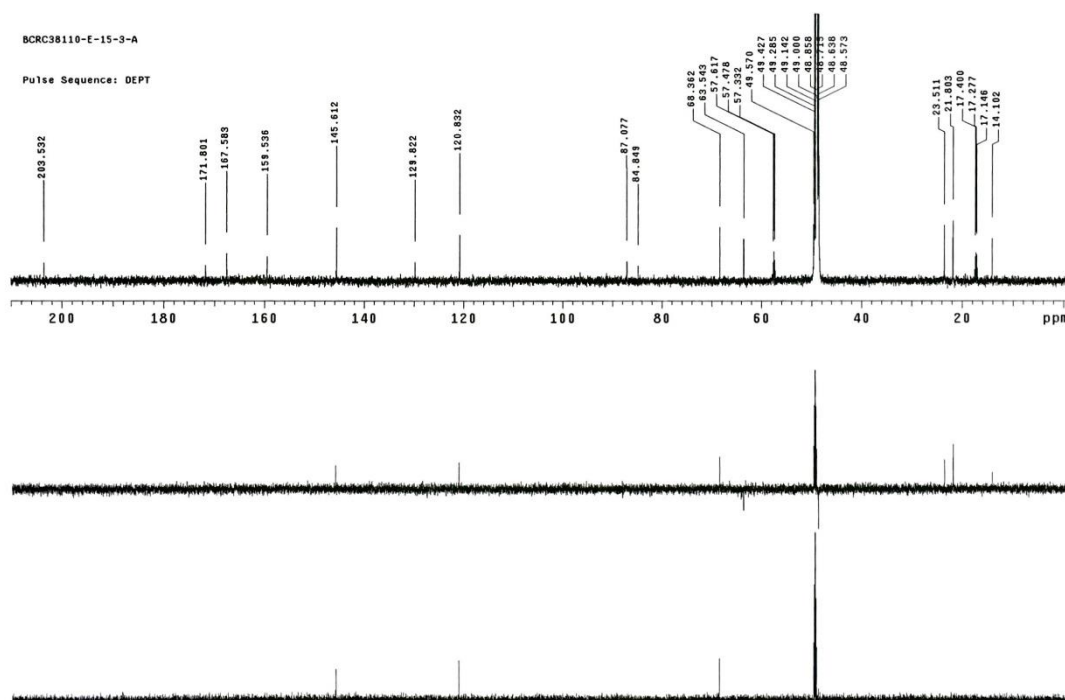

Figure S3. DEPT spectrum of 5S,6S-monaspurpyridine A (1)

BCRC38110-E-15-3-A

exp28 gCOSY

date Mar 26 2018 hs flags nn

solvent cd3od sspul y

sample hsglv 5323

ACQUISITION SPECIAL

sw 9542.0 temp 28.0

at 0.150 gain 53

np 2862 spin not used

fb 4000 f2 PROCESSING

ss 32 sb -0.075

d1 1.000 sbs not used

nt 40 fn 4096

2D ACQUISITION f1 PROCESSING

sw1 9542.0 sb1 -0.013

nt 160 sb1 not used

d2 PRESATURATION 0 proci lp

satmode n fnl DISPLAY 4096

wet TRANSMITTER n sp -122.8

tn H1 ep1 8089.5

sfrq 597.279 wp1 -122.1

torf 597.3 rfp 8089.5

tpwr 58 rfp 1180.4

pv 12.000 rfp1 0

GRADIENTS rfp1 0

gzlvie 4444 PLOT

giz 0.001000 wc 140.0

Edratio 1.000 sc 5.0

gstab 0.000500 wc2 140.0

DECOUPLER sc2 5.0

dn C13 vs 1000

da nn al cdc av 8

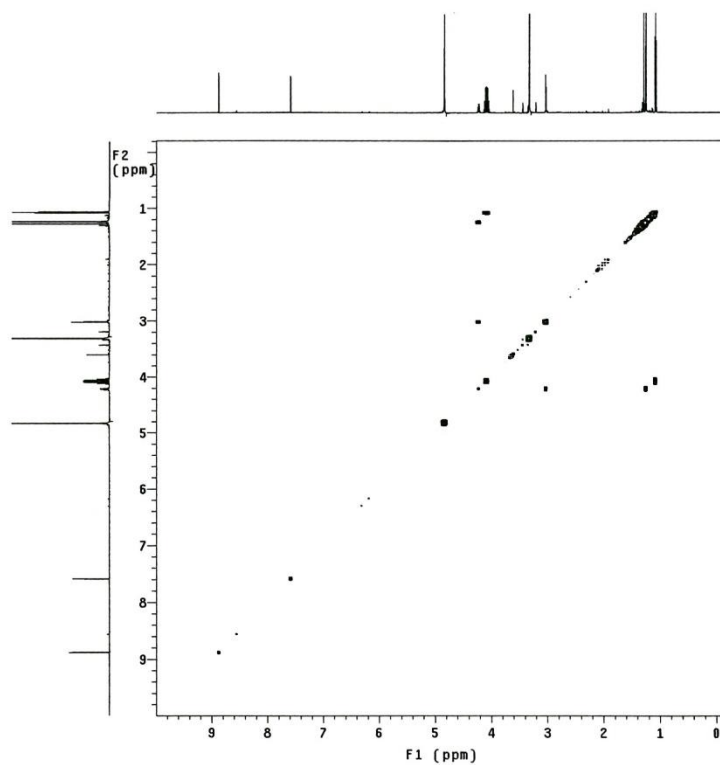

Figure S4. COSY spectrum of 5S,6S-monaspurpyridine A (1)

BCRC38110-E-15-3-A

Pulse Sequence: gHMBCAD

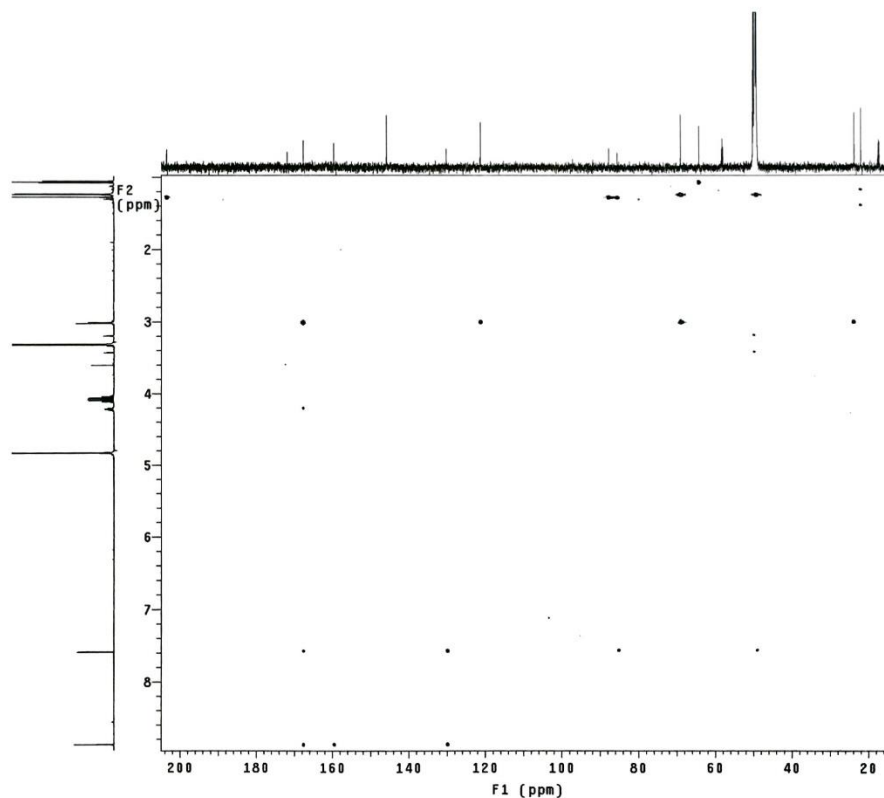

Figure S5. HMBC spectrum of 5S,6S-monapurpyridine A (1)

BCRC38110-E-15-3-A

exp29 NOESY

| SAMPLE         |             | FLAGS  |                |
|----------------|-------------|--------|----------------|
| date           | Mar 26 2018 | hs     | nn             |
| solvent        | cd3od       | sspul  | y              |
| sample         | PF01g       | y      |                |
| ACQUISITION    |             |        |                |
| sw             | 9542.0      | hsglv1 | 5328           |
| at             | 0.150       | temp   | SPECIAL 28.0   |
| np             | 2862        | gain   | 48             |
| fb             | 4000        | spin   | not used       |
| ss             | 32          | f2     | PROCESSING     |
| dl             | 1.500       | gf     | 0.069          |
| nt             | 40          | dfs    | not used       |
| 2D ACQUISITION |             |        |                |
| sw1            | 9542.0      | gf1    | PROCESSING     |
| nt1            | 160         | gf1    | 0.014          |
| TRANSMITTER    |             |        |                |
| tn             | H1          | gfsl   | not used       |
| sfrq           | 597.279     | fn1    | 1p             |
| tof            | 597.3       | fn1    | 4096           |
| tpwr           | 58          | sp     | DISPLAY -120.0 |
| pw             | 12.000      | wp     | 6089.5         |
| NOESY          |             |        |                |
| mixN           | 0.600       | wp1    | 6089.5         |
| PRESATURATION  |             |        |                |
| satmode        | n           | rf1    | 1186.9         |
| wet            | n           | rf11   | 0              |
| DECOUPLER      |             |        |                |
| dn             | C13         | rfp1   | 1182.0         |
| da             | nnn         | rfp1   | 0              |
| PLOT           |             |        |                |
| wc             | 140.0       |        |                |
| sc             | 5.0         |        |                |
| vc2            | 140.0       |        |                |
| sc2            | 5.0         |        |                |
| vs             | 321         |        |                |
| th             | 4           |        |                |
| al             | cdc         | ph     |                |

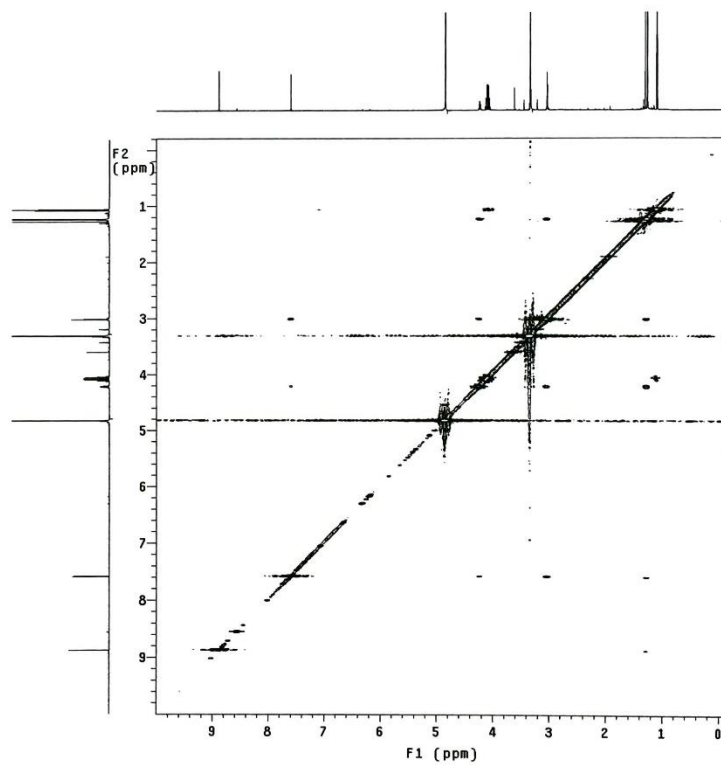

Figure S6. NOESY spectrum of 5S,6S-monapurpyridine A (1)

## Mass Spectrum SmartFormula Report

### Analysis Info

Analysis Name D:\Data\7\BCRC38110E153A\_000005.d  
 Method broadband first signal  
 Sample Name BCRC38110-E-15-3-A  
 Comment ESI Positive

5/11/2018 3:36:13 PM  
 Operator: YU HSIAO-CHING  
 Instrument: BRUKER FT-MS solariX

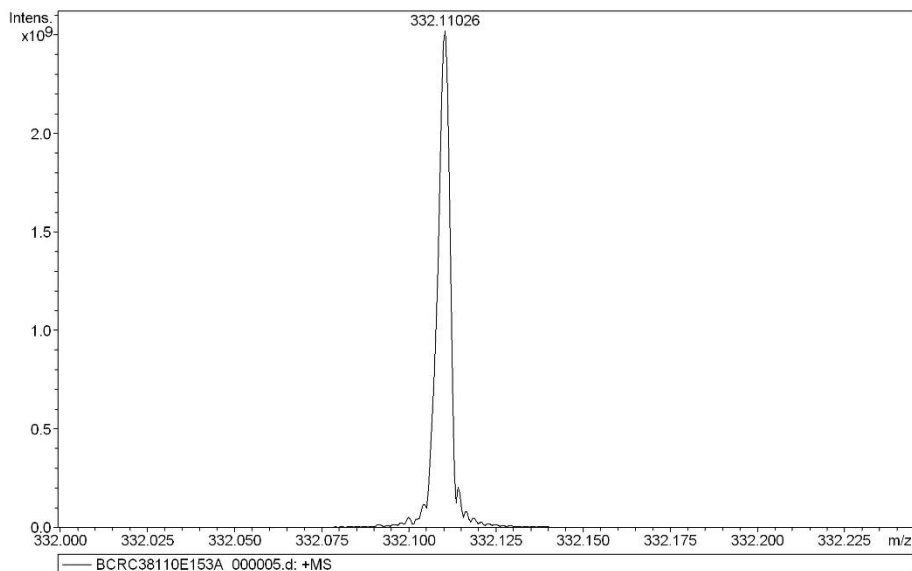

| Meas. m/z | # | Formula            | Score  | m/z       | err [mDa] | err [ppm] | mSigma | rdb | e <sup>-</sup> Conf | N-Rule |
|-----------|---|--------------------|--------|-----------|-----------|-----------|--------|-----|---------------------|--------|
| 332.11026 | 1 | C 15 H 19 N Na O 6 | 100.00 | 332.11046 | 0.20      | 0.59      | 10.1   | 6.5 | even                | ok     |

Figure S7. HRESIMS spectrum of 5S,6S-monapurpyridine A (1)

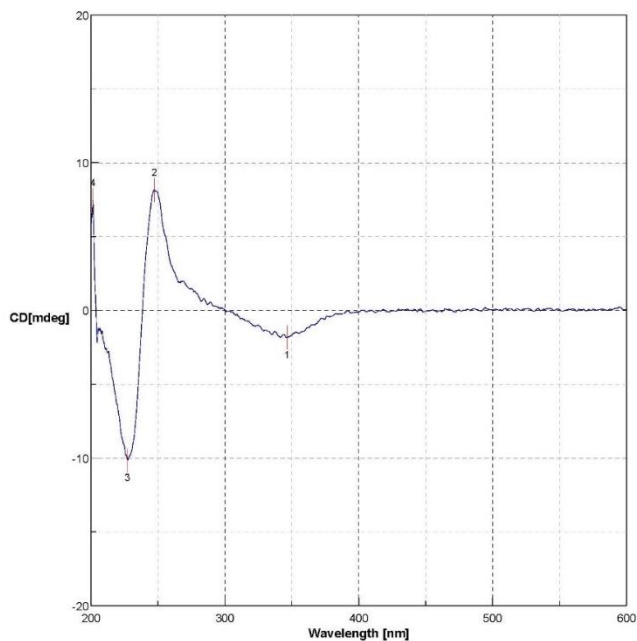

Date/Time 2018/7/4 9:53 下午  
 Operator User  
 File Name BCRC38110-E-15-3-A(smooth).jws  
 Sample Name  
 Comment

| No. | nm    | CD[mdeg] | No. | nm    | CD[mdeg] | No. | nm    | CD[mdeg] |
|-----|-------|----------|-----|-------|----------|-----|-------|----------|
| 1   | 346.6 | -1.84031 | 2   | 247.2 | 8.1544   | 3   | 227.4 | -10.1339 |
| 4   | 201.4 | 7.45978  |     |       |          |     |       |          |

Figure S8. CD spectrum of 5S,6S-monapurpyridine A (1)

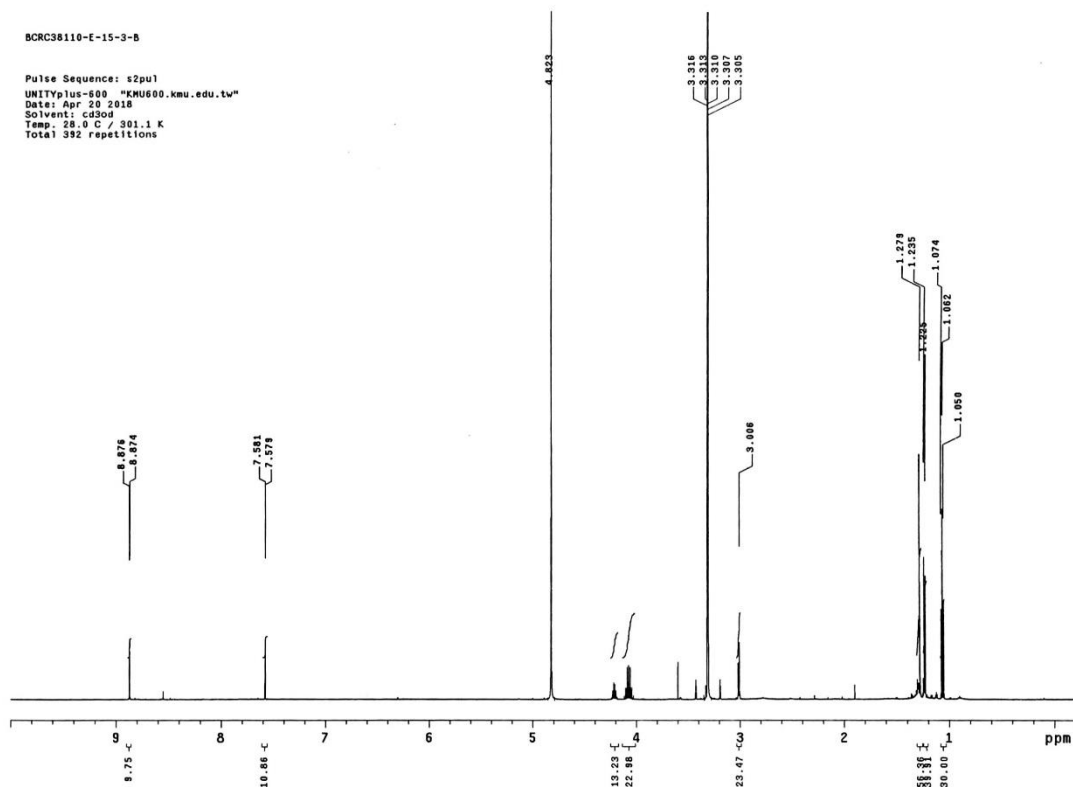

Figure S9.  $^1\text{H}$  NMR spectrum of 5R,6R-monaspurpyridine A (**2**) in  $\text{CD}_3\text{OD}$  at 600 MHz

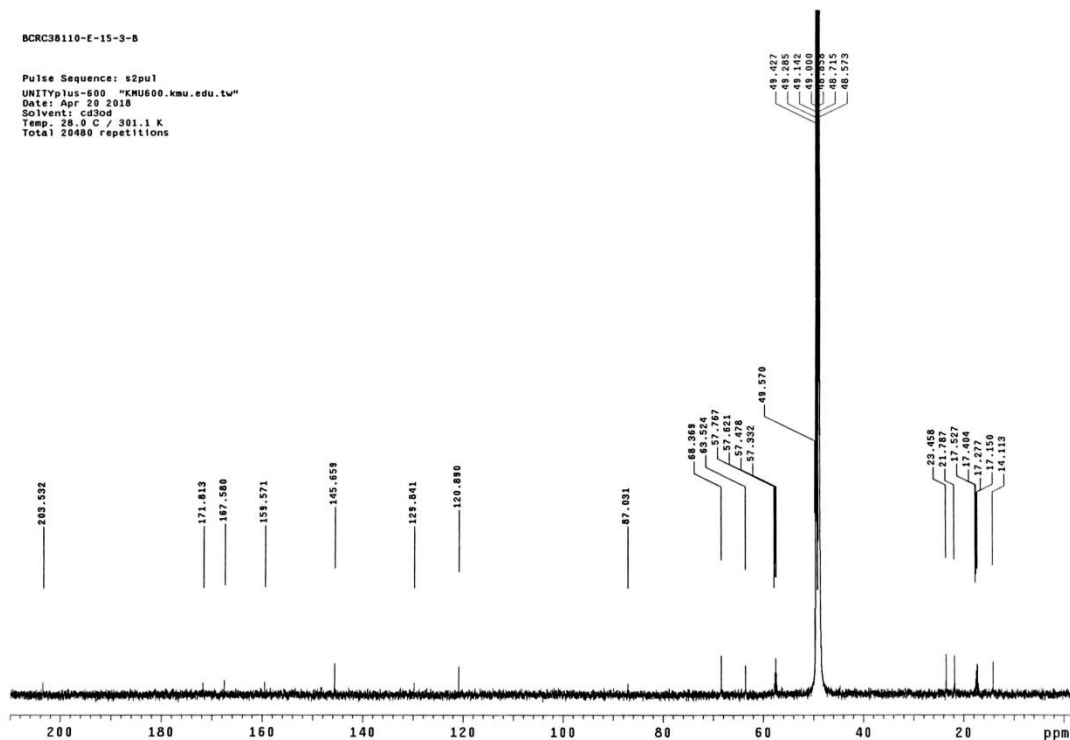

Figure S10.  $^{13}\text{C}$  NMR spectrum of 5R,6R-monaspurpyridine A (**2**) in  $\text{CD}_3\text{OD}$  at 125 MHz



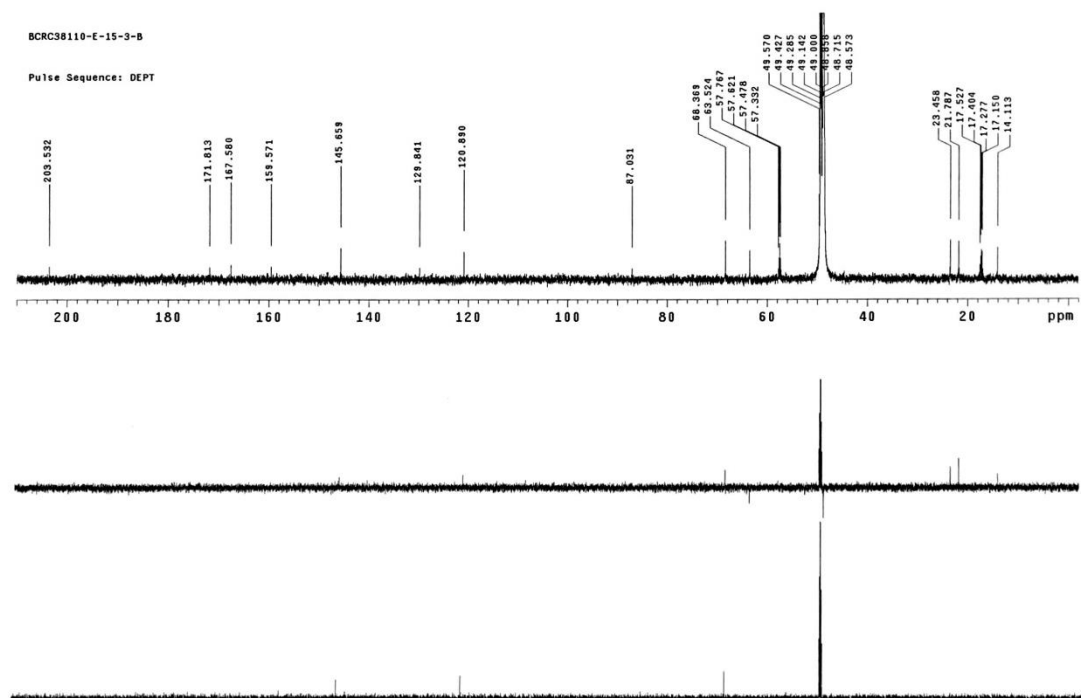

Figure S11. DEPT spectrum of 5R,6R-monaspurpyridine A (2)

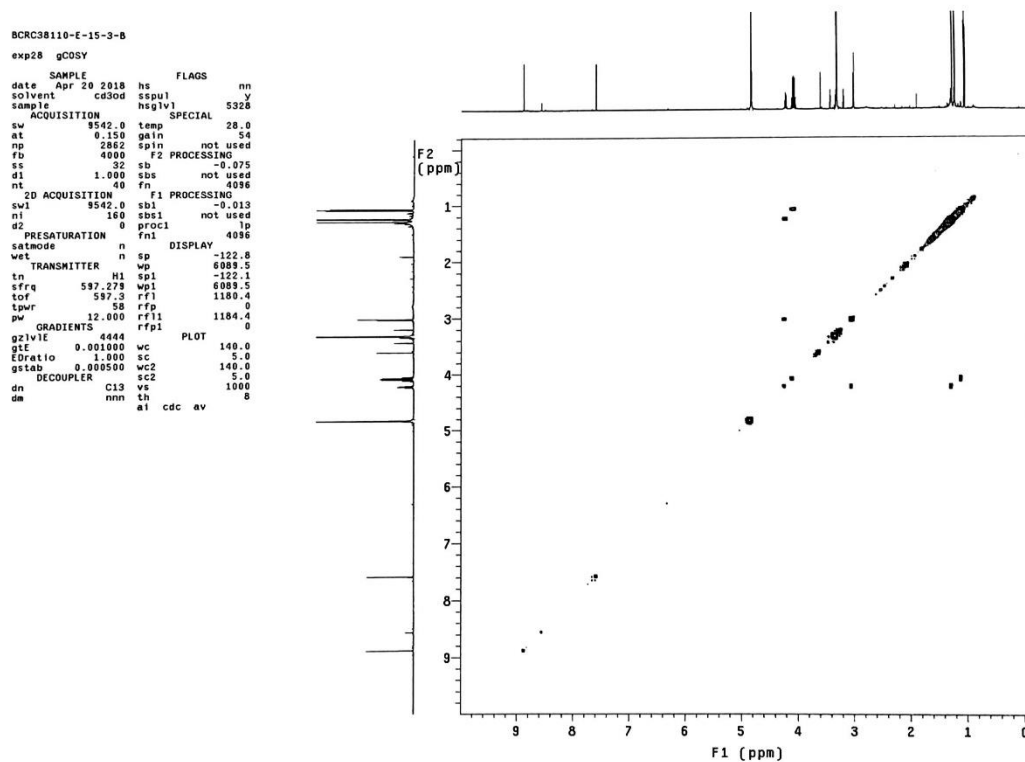

Figure S12. COSY spectrum of 5R,6R-monaspurpyridine A (2)

BCRC38110-E-15-3-B

Pulse Sequence: gHMBCAD

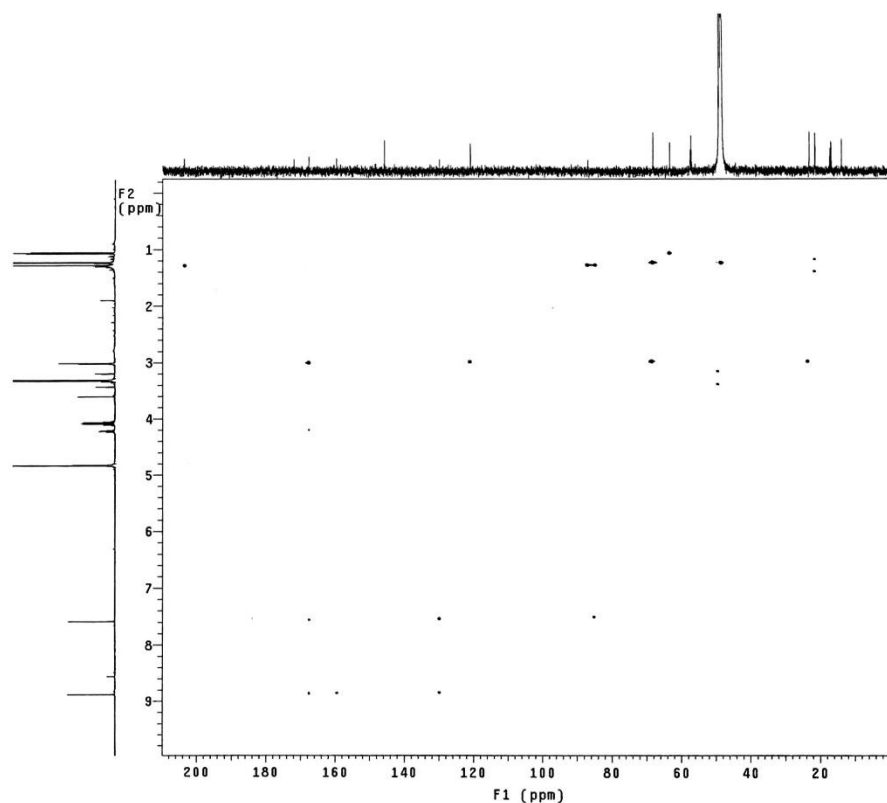

Figure S13. HMBC spectrum of 5R,6R-monaspurpyridine A (2)

BCRC38110-E-15-3-B

exp29 NOESY

| SAMPLE         |             | FLAGS         |          |
|----------------|-------------|---------------|----------|
| date           | Apr 20 2018 | hs            | nn       |
| solvent        | cd3od       | sspul         | y        |
| sample         |             | PF01g         | y        |
| ACQUISITION    |             | hsglv1        | 5328     |
| sv             | 9542.0      | SPECIAL       |          |
| at             | 0.150       | temp          | 28.0     |
| np             | 2862        | gain          | 50       |
| fb             | 4000        | spin          | not used |
| ss             | 32          | F2 PROCESSING |          |
| d1             | 1.500       | gf            | 0.069    |
| nt             | 40          | gfs           | not used |
| 2D ACQUISITION |             | fn            | 9096     |
| sw1            | 9542.0      | gf1           | 0.014    |
| nl             | 160         | gfs1          | not used |
| tn             |             | PROC1         | lp       |
| sfrq           | 597.279     | fn1           | 4096     |
| tof            | 597.3       | sp            | DISPLAY  |
| tpwr           | 58          | vp            | -120.0   |
| pw             | 12.000      | vp1           | 6089.5   |
| mixN           | NOESY       | sp1           | -119.8   |
|                | 0.600       | vp1           | 6089.5   |
| PRESATURATION  |             | rf1           | 1186.9   |
| satmode        | n           | rfp           | 0        |
| wet            | n           | rf11          | 1182.0   |
| DECOUPLER      |             | rfp1          | 0        |
| dn             | C13         | PLOT          |          |
| dm             | nnn         | vc            | 140.0    |
|                |             | sc            | 5.0      |
|                |             | vc2           | 140.0    |
|                |             | sc2           | 5.0      |
|                |             | vs            | 321      |
|                |             | th            | 4        |
|                |             | a1            | cdc ph   |

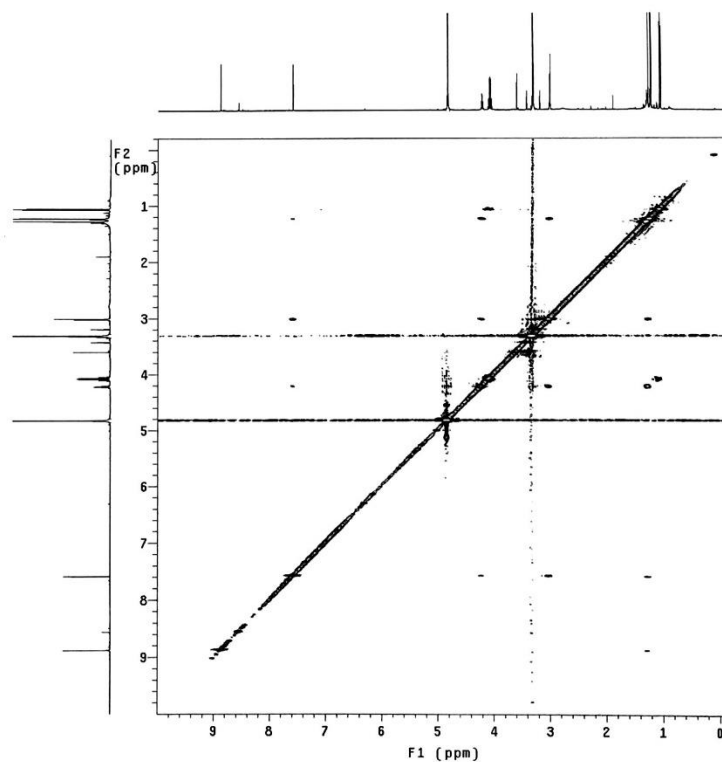

Figure S14. NOESY spectrum of 5R,6R-monaspurpyridine A (2)

## Mass Spectrum SmartFormula Report

### Analysis Info

Analysis Name D:\Data\7\BCRC38110E153B\_000005.d  
 Method broadband first signal  
 Sample Name BCRC38110-E-15-3-B  
 Comment ESI Positive

5/11/2018 4:08:05 PM  
 Operator: YU HSIAO-CHING  
 Instrument: BRUKER FT-MS solariX

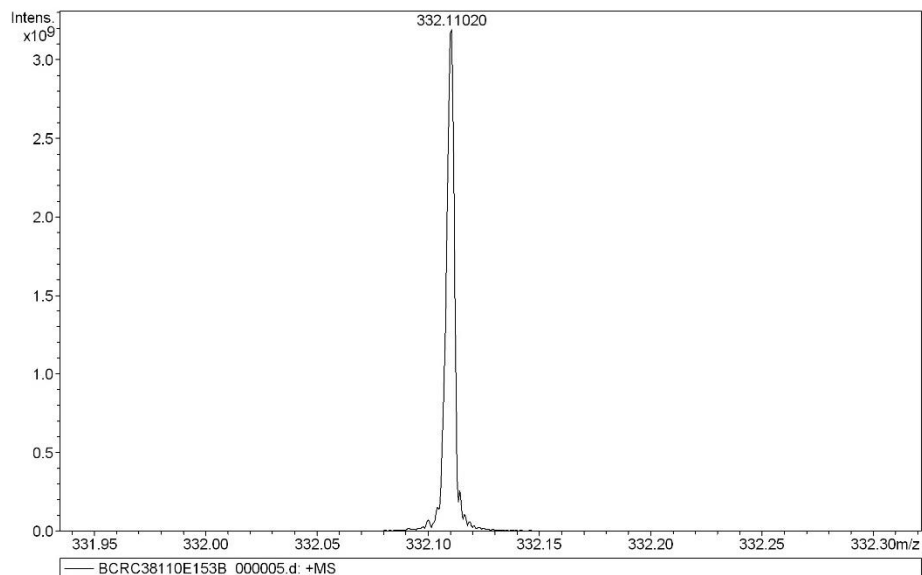

| Meas. m/z | # | Formula                                                         | Score  | m/z       | err [mDa] | err [ppm] | mSigma | rdB | e <sup>-</sup> | Conf | N-Rule |
|-----------|---|-----------------------------------------------------------------|--------|-----------|-----------|-----------|--------|-----|----------------|------|--------|
| 332.11020 | 1 | C <sub>15</sub> H <sub>19</sub> N <sub>3</sub> NaO <sub>6</sub> | 100.00 | 332.11046 | 0.26      | 0.78      | 14.0   | 6.5 | even           |      | ok     |

Figure S15. HRESIMS spectrum of 5*R*,6*R*-monaspurpyridine A (2)

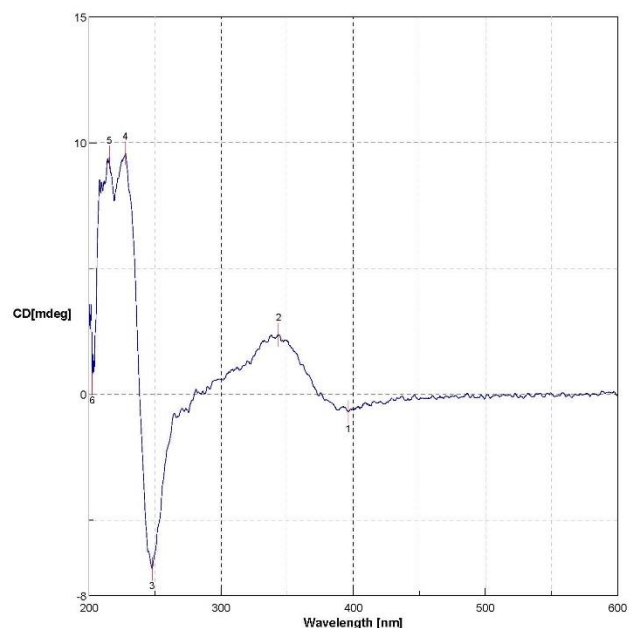

Date/Time 2018/7/4 10:01  
 Operator User  
 File Name BCRC38110-E-15-3-B(smooth).jws  
 Sample Name  
 Comment

| No. | nm    | CD[mdeg]  | No. | nm    | CD[mdeg] | No. | nm    | CD[mdeg] |
|-----|-------|-----------|-----|-------|----------|-----|-------|----------|
| 1   | 396.1 | -0.683127 | 2   | 343.4 | 2.37172  | 3   | 247.7 | -6.92546 |
| 4   | 227.6 | 9.57412   | 5   | 215.4 | 9.41946  | 6   | 202.5 | 0.443001 |

Figure S16. CD spectrum of 5*R*,6*R*-monaspurpyridine A (2)

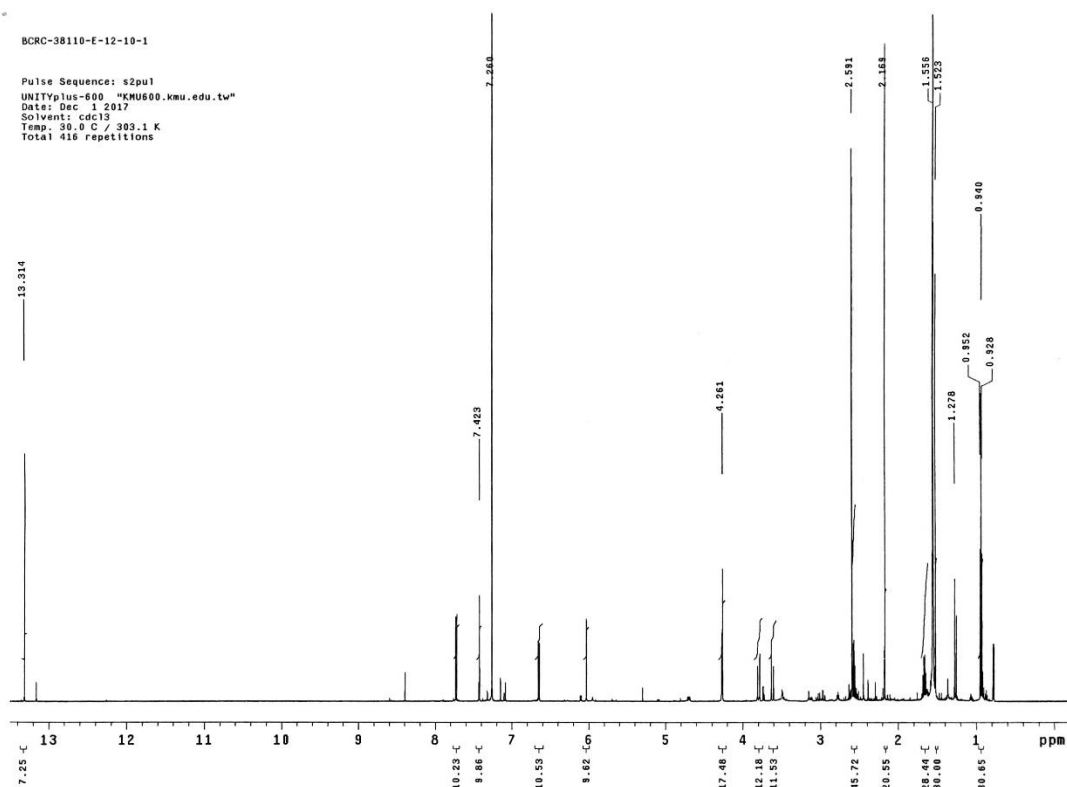

Figure S17.  $^1\text{H}$  NMR spectrum of monasxanthone A (**3**) in  $\text{CDCl}_3$  at 600 MHz

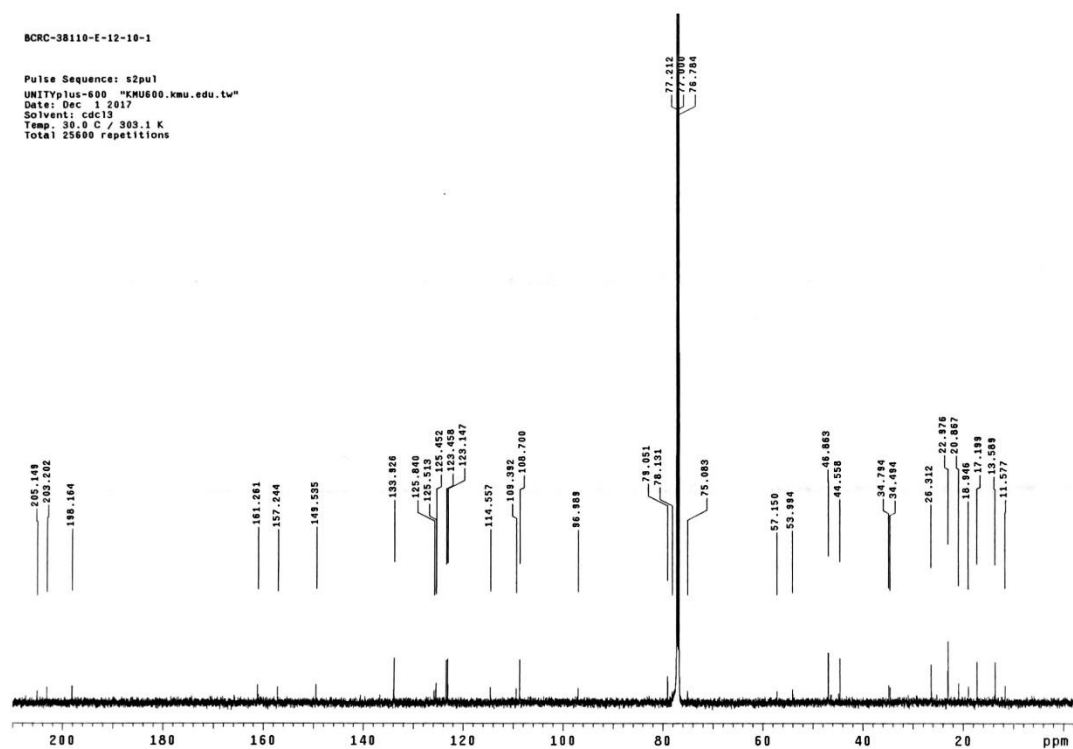

Figure S18.  $^{13}\text{C}$  NMR spectrum of monasxanthone A (**3**) in  $\text{CDCl}_3$  at 125 MHz

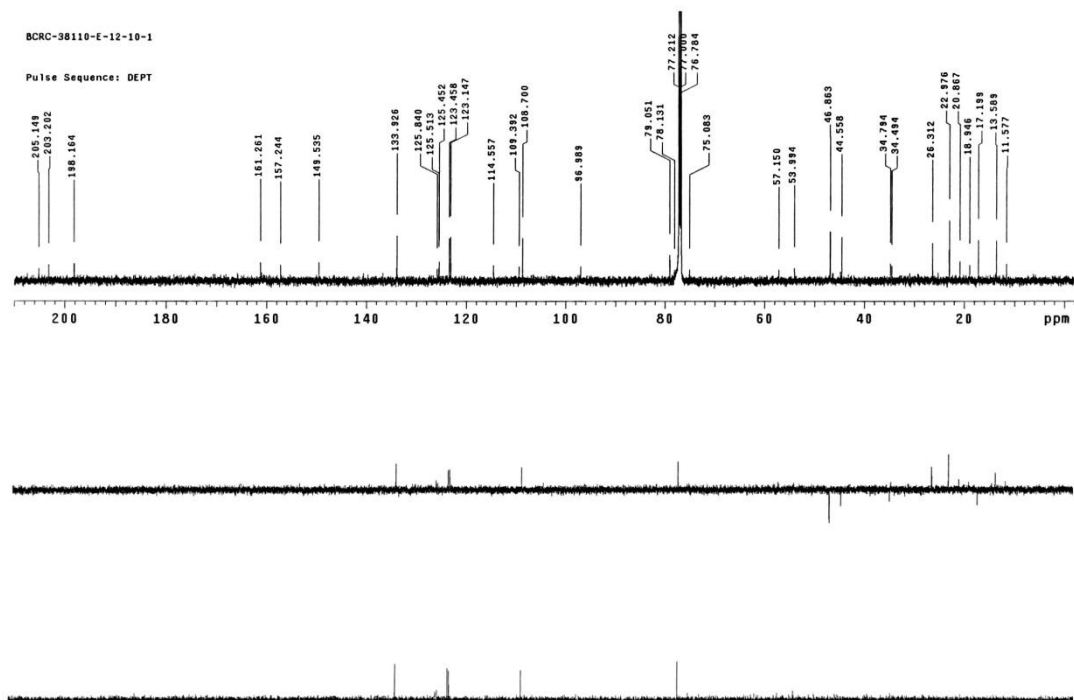

Figure S19. DEPT spectrum of monasxanthone A (3)

BCRC-38110-E-12-10-1

exp49 gCOSY

SAMPLE

date Dec 1 2017 hs

solvent cdc13

sample hsg1v1

ACQUISITION

sv 9542.0 temp

at 0.150 gain

rp 2882 spin

fb 4000 f2 PROCESSING

ss 32 sb

d1 1.000 sbs

nt 40 fn

2D ACQUISITION

sv1 9542.0 sb1

nt 160 sb1

d2 PRESATURATION

satmode n

wet TRANSMITTER

tn H1

sfrq 597.287

tofr 597.2

tpwr 58

GRADIENTS

g2lvie 4024

g2 0.001000

EDratio 1.000

gstab 0.000500

DECOUPLER

dn C13

dm nnn

nnn

th

av

8

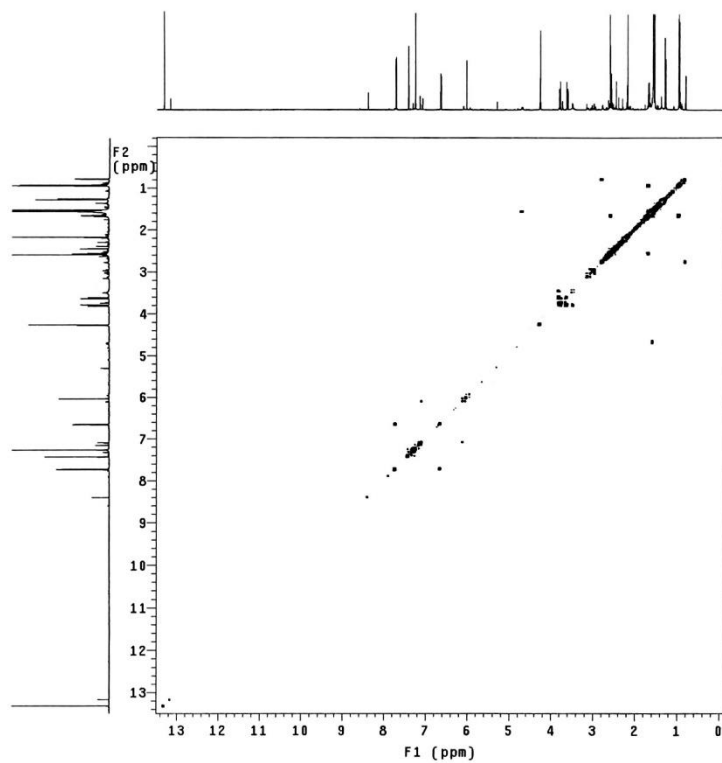

Figure S20. COSY spectrum of monasxanthone A (3)

BCRC-38110-E-12-10-1

Pulse Sequence: gHMBCAD

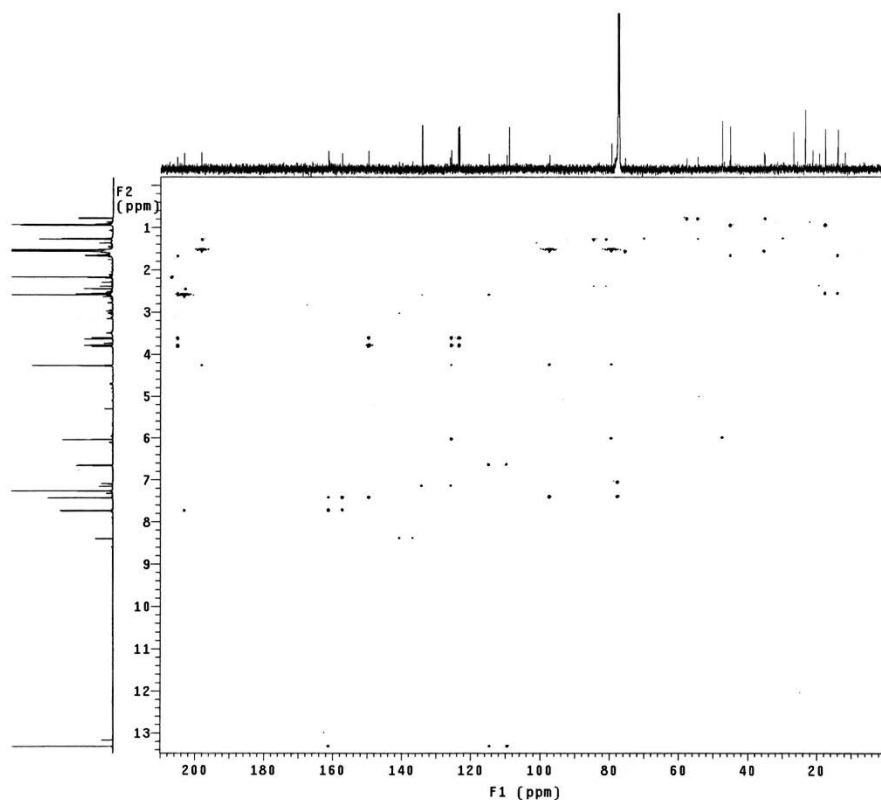

Figure S21. HMBC spectrum of monasxanthone A (3)

BCRC-38110-E-12-10-1

exp50 NOESY

| SAMPLE         |            | FLAGS         |          |
|----------------|------------|---------------|----------|
| date           | Dec 1 2017 | hs            | nn       |
| solvent        | cdc13      | sspul         | y        |
| sample         |            | PF01g         | y        |
| ACQUISITION    |            | hsglv1        | 5304     |
| sv             | 9542.0     | SPECIAL       | 30.0     |
| at             | 0.150      | temp          | 50       |
| np             | 2862       | gain          | not used |
| fb             | 4000       | spin          | not used |
| ss             | 32         | F2 PROCESSING |          |
| d1             | 1.500      | qf            | 0.059    |
| nt             | 40         | qfs           | not used |
| 2D ACQUISITION |            | fn            | 4096     |
| sw1            | 9542.0     | gf1           | 0.019    |
| nt             | 160        | gfsl          | not used |
| tn             |            | H1            | lp       |
| sfreq          | 597.287    | fn1           | 4096     |
| tof            | 597.2      | sp            | -124.0   |
| tpwr           | 58         | wp            | 8181.5   |
| pw             | 12.500     | ep1           | -124.0   |
| mixN           | 0.600      | wp1           | 8181.5   |
| PRESATURATION  |            | rf1           | 1195.7   |
| satmode        | n          | rfp           | 0        |
| wet            | n          | rf11          | 1195.7   |
| DECOUPLER      |            | rfp1          | 0        |
| dn             | C13        | PLOT          |          |
| da             | nnn        | vc            | 140.0    |
|                |            | sc            | 5.0      |
|                |            | vc2           | 140.0    |
|                |            | sc2           | 5.0      |
|                |            | vs            | 975      |
|                |            | th            | 2        |
|                |            | al            | cdc ph   |

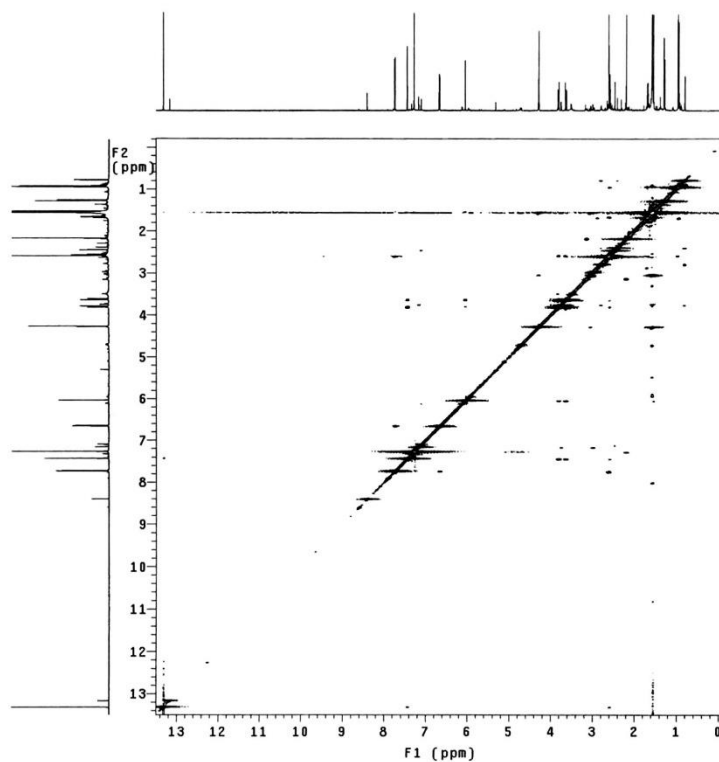

Figure S22. NOESY spectrum of monasxanthone A (3)

## Mass Spectrum SmartFormula Report

### Analysis Info

Analysis Name D:\Data\7\BCRC38110E12101\_000010.d  
Method broadband first signal  
Sample Name BCRC38110-E-12-10-1  
Comment ESI Positive

1/12/2018 4:53:40 PM  
Operator: YU HSIAO-CHING  
Instrument: BRUKER FT-MS solarix

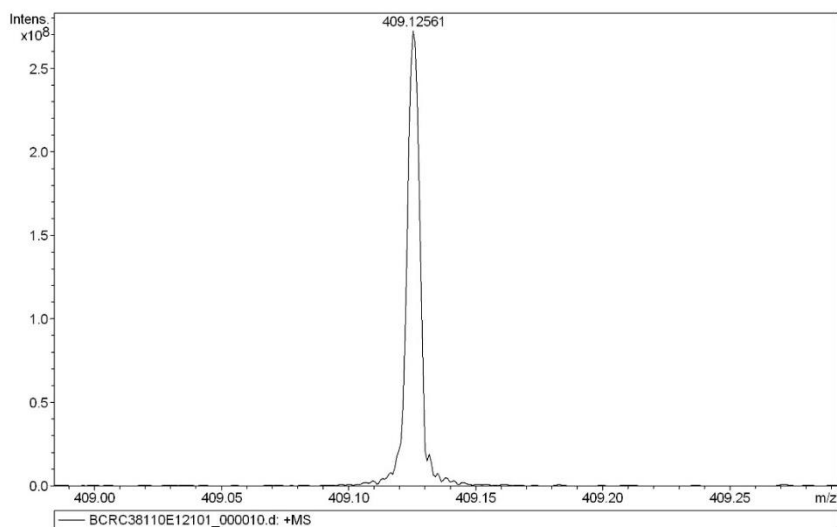

| Meas. m/z | # | Formula                                          | Score  | m/z       | err [mDa] | err [ppm] | mSigma | rdb  | e <sup>-</sup> Conf | N-Rule |
|-----------|---|--------------------------------------------------|--------|-----------|-----------|-----------|--------|------|---------------------|--------|
| 409.12561 | 1 | C <sub>21</sub> H <sub>22</sub> NaO <sub>7</sub> | 100.00 | 409.12577 | 0.17      | 0.41      | 15.9   | 10.5 | even                | ok     |

Figure S23. HRESIMS spectrum of monasxanthone A (3)

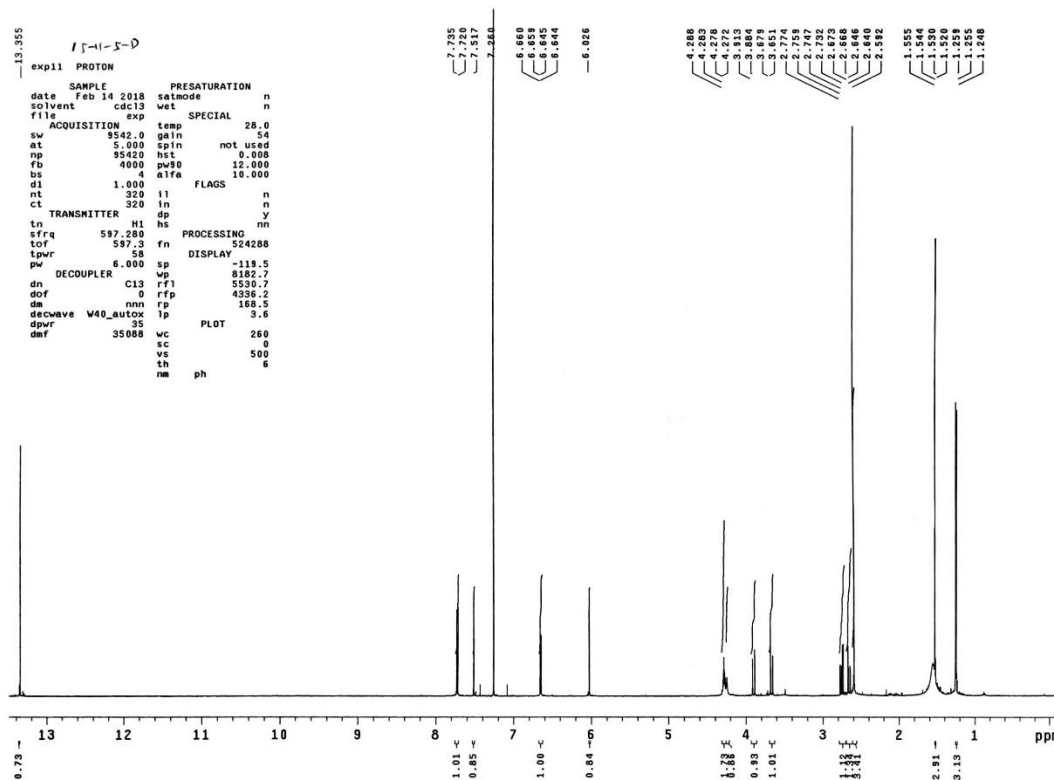

Figure S24. <sup>1</sup>H NMR spectrum of monasxanthone B (4) in CDCl<sub>3</sub> at 600 MHz

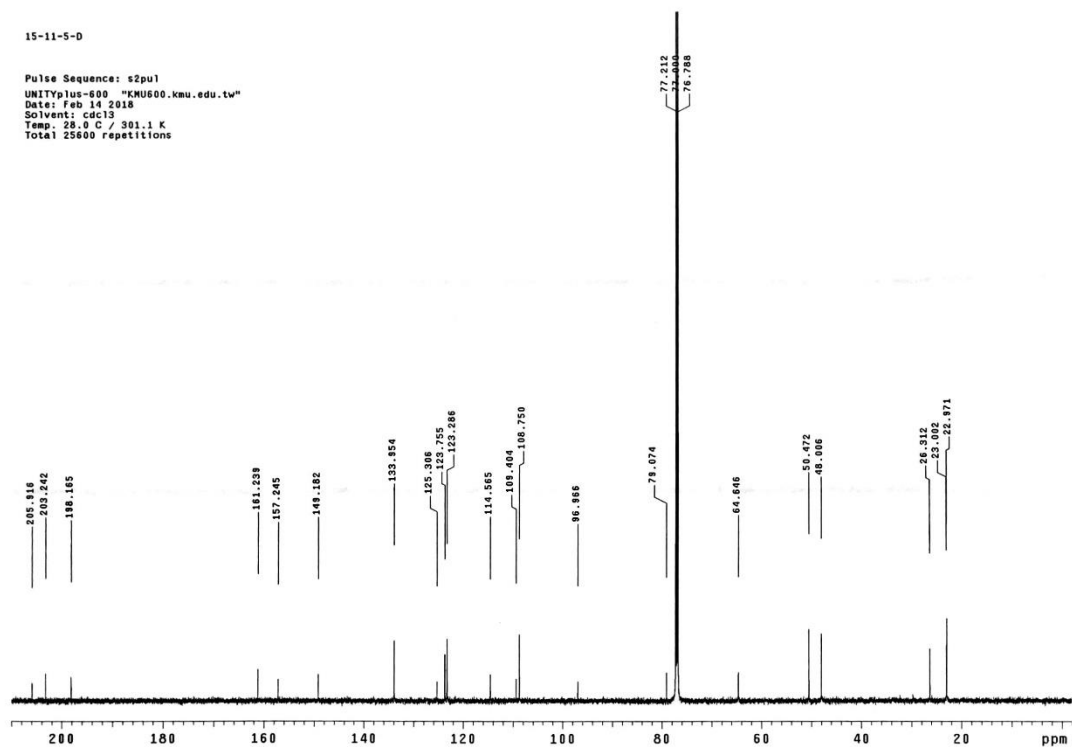

Figure S25.  $^{13}\text{C}$  NMR spectrum of monasxanthone B (**4**) in  $\text{CDCl}_3$  at 125 MHz

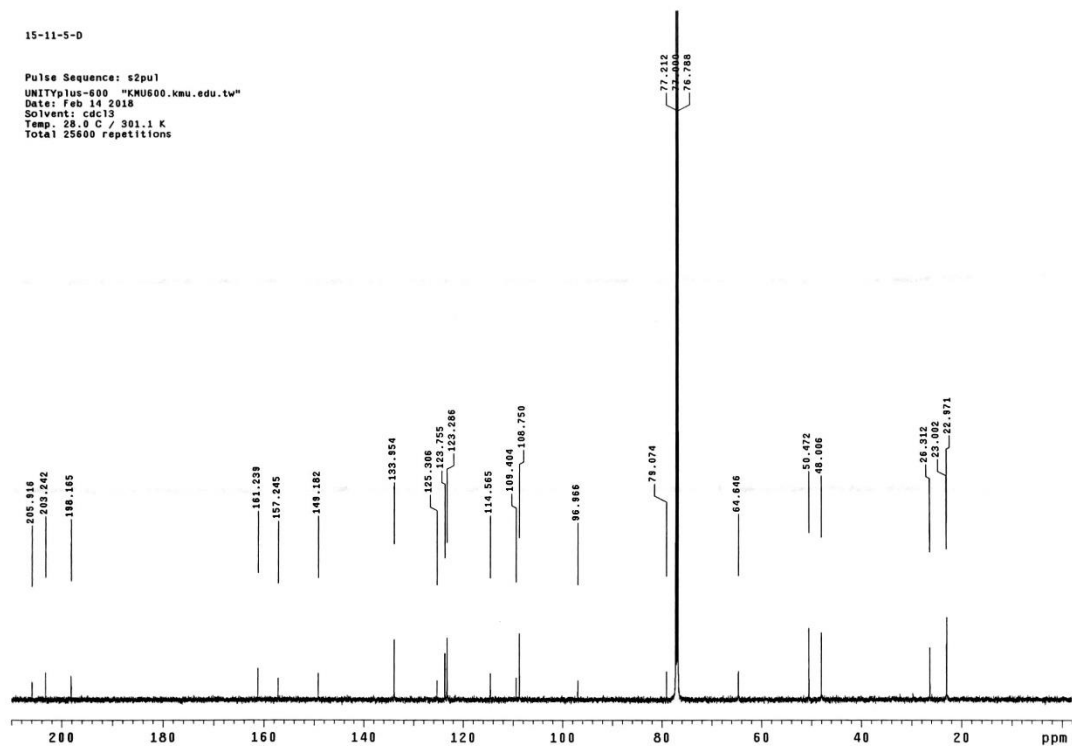

Figure S26. DEPT spectrum of monasxanthone B (**4**)



exp14 gCOSY

|                |             |               |          |    |
|----------------|-------------|---------------|----------|----|
| date           | Feb 14 2018 | hs            | flags    | nm |
| solvent        | cdcl3       | sspul         |          | y  |
| sample         | hsglv1      | 5328          |          |    |
| ACQUISITION    |             |               |          |    |
| sw             | 9542.0      | temp          | 28.0     |    |
| at             | 0.150       | gain          | 54       |    |
| np             | 2882        | spin          | not used |    |
| fb             | 4000        | f2 PROCESSING |          |    |
| ss             | 32          | sb            | -0.075   |    |
| d1             | 1.000       | sbs           | not used |    |
| nt             | 40          | fn            | 4095     |    |
| 2D ACQUISITION |             |               |          |    |
| sw1            | 9542.0      | sb1           | -0.013   |    |
| nl             | 180         | sbs1          | not used |    |
| d2             | 0           | procl         | lp       |    |
| PRESATURATION  |             |               |          |    |
| satmode        | n           | fn1           | 4095     |    |
| wet            | n           | sp            | -1.7     |    |
| TRANSMITTER    |             |               |          |    |
| tn             | H1          | sp1           | -1.7     |    |
| sfrq           | 597.280     | wp1           | 8242.1   |    |
| tor            | 597.3       | rf1           | 1194.5   |    |
| tpwr           | 58          | rffp          | 0        |    |
| pw             | 12.000      | rff1          | 1194.5   |    |
| GRADIENTS      |             |               |          |    |
| g2lv1E         | 4444        | PL0T          |          |    |
| g1E            | 0.001000    | vc            | 140.0    |    |
| Edratio        | 1.000       | sc            | 5.0      |    |
| gstab          | 0.000500    | vc2           | 140.0    |    |
| DECOUPLER      |             |               |          |    |
| dn             | C13         | vs            | 165      |    |
| dm             | nnn         | th            | cdc av   | 7  |

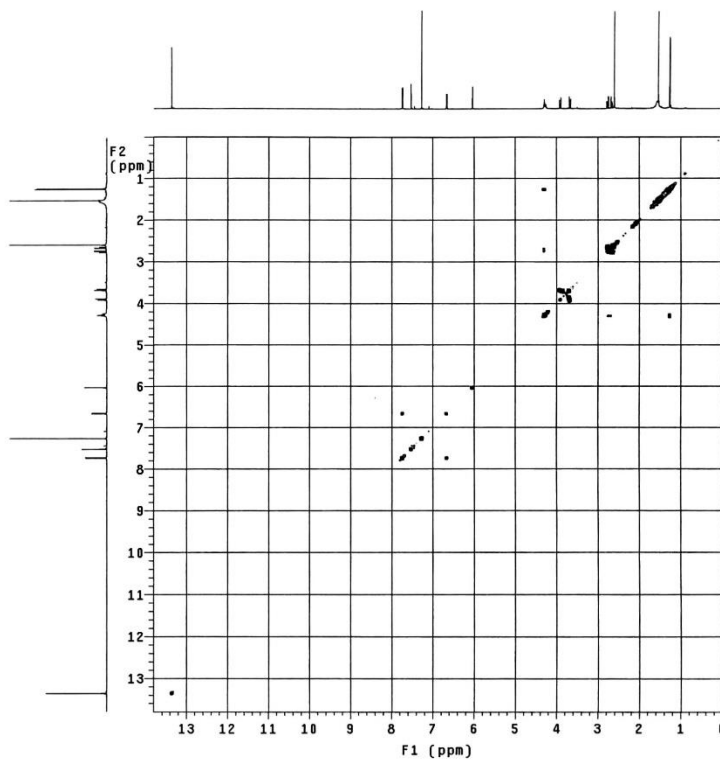

Figure S27. COSY spectrum of monasxanthone B (4)

Pulse Sequence: gHMBCAD

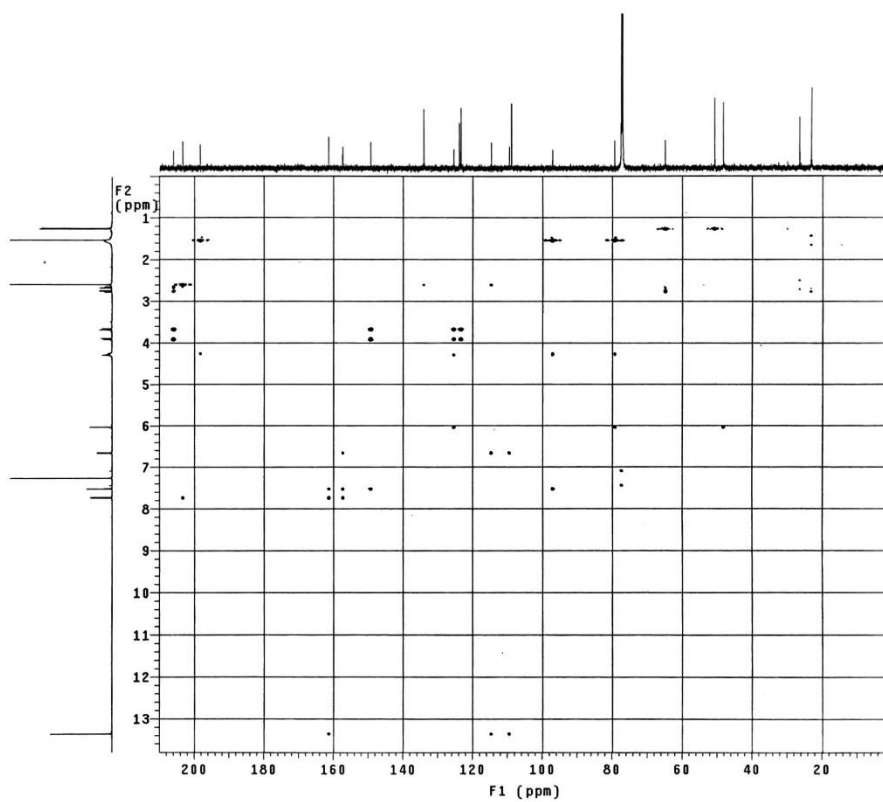

Figure S28. HMBC spectrum of monasxanthone B (4)

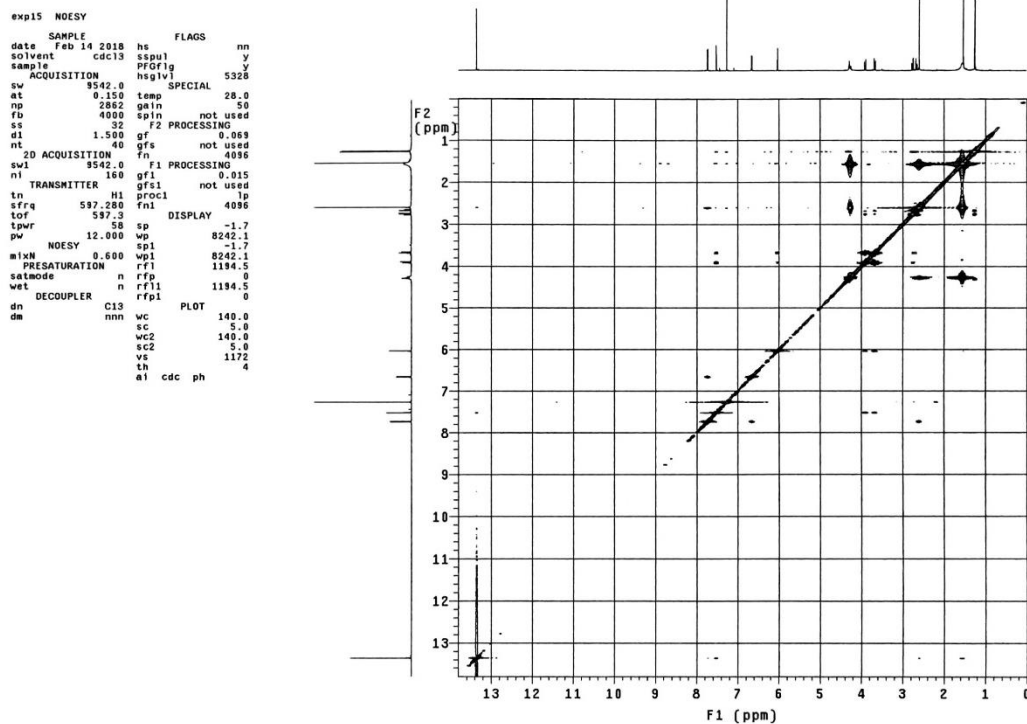

Figure S29. NOESY spectrum of monasxanthone B (4)

### Mass Spectrum SmartFormula Report

#### Analysis Info

Analysis Name D:\Data\7\BCRC38110E15115D\_000002.d  
 Method broadband first signal  
 Sample Name BCRC48110-E-15-11-5-D  
 Comment ESI Positive

3/12/2018 2:54:25 PM  
 Operator: YU HSIAO-CHING  
 Instrument: BRUKER FT-MS solariX

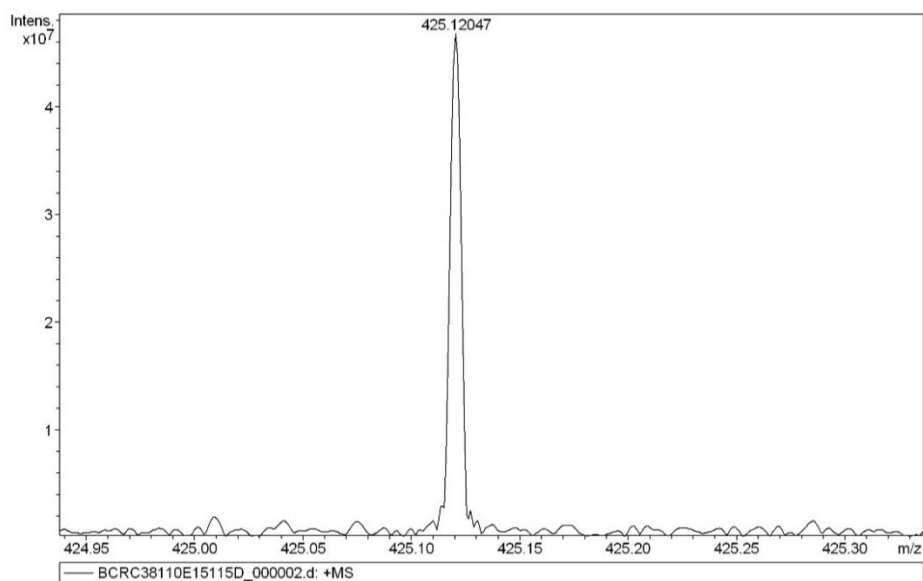

| Meas. m/z | # | Formula          | Score  | m/z       | err [mDa] | err [ppm] | mSigma | rdb  | e <sup>-</sup> Conf | N-Rule |
|-----------|---|------------------|--------|-----------|-----------|-----------|--------|------|---------------------|--------|
| 425.12047 | 1 | C 21 H 22 Na O 8 | 100.00 | 425.12069 | 0.22      | 0.52      | 20.6   | 10.5 | even                | ok     |

Figure S30. HRESIMS spectrum of monasxanthone B (4)



15-3-C\_COSY  
exp21 gCOSY

| SAMPLE         |             | FLAGS         | nn       |
|----------------|-------------|---------------|----------|
| date           | Mar 22 2018 | hs            | nn       |
| solvent        | acetone     | sspl          | Y        |
| sample         |             | hsglv         | 5328     |
| ACQUISITION    |             | SPECIAL       |          |
| sw             | 9542.0      | temp          | 28.0     |
| at             | 0.150       | goin          | 54       |
| np             | 2862        | spin          | 0        |
| fb             | 4000        | F2 PROCESSING |          |
| ss             | 32          | sb            | -0.075   |
| d1             | 1.000       | sbs           | not used |
| nt             | 64          | fn            | 4096     |
| 2D ACQUISITION |             | F1 PROCESSING |          |
| sw1            | 9542.0      | sb1           | -0.017   |
| n1             | 160         | sbs1          | not used |
| d2             | 0           | procl         | 1p       |
| PRESATURATION  |             | fn1           | 4096     |
| satmode        | n           | sp            | -1.5     |
| wet            | TRANSMITTER | vp            | 6089.5   |
| tn             | H1          | sp1           | -1.5     |
| sfrq           | 597.280     | vp1           | 6089.5   |
| tof            | 597.3       | rf1           | 1184.9   |
| tpwr           | 58          | rfp           | 0        |
| pw             | 12.000      | rf11          | 1184.9   |
| GRADIENTS      |             | rfp1          | 0        |
| g2lv1e         | 4444        | PLOT          |          |
| g1e            | 0.001000    | vc            | 140.0    |
| Edratio        | 1.000       | sc            | 5.0      |
| gsteb          | 0.000500    | wc2           | 140.0    |
| DECOUPLER      | sc2         | vc2           | 5.0      |
| dn             | C13         | vs            | 2343     |
| dm             | nnn         | th            | 8        |
|                | et          | cdc           | av       |

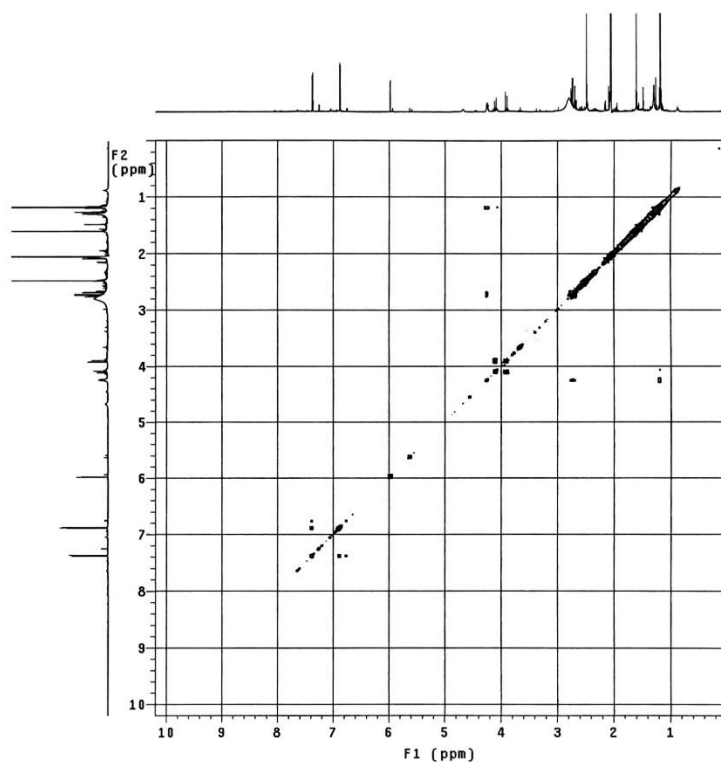

Figure S33. COSY spectrum of monasnaphthalenone (5)

BCRC38110-E-15-3-C

Pulse Sequence: gHMBC

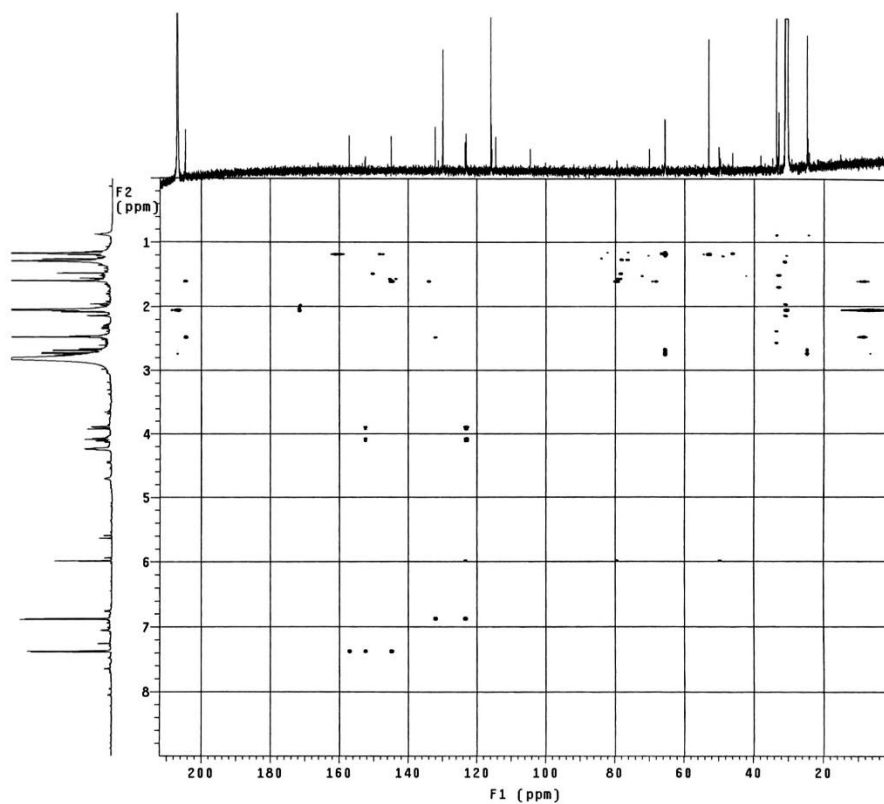

Figure S34. HMBC spectrum of monasnaphthalenone (5)

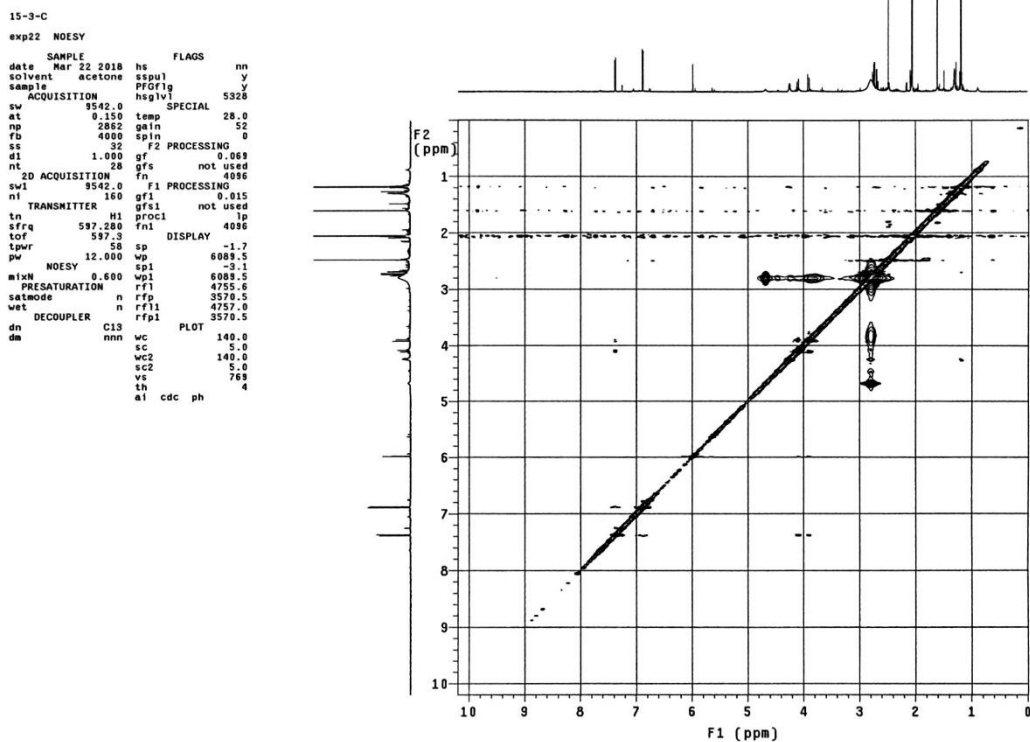

Figure S35. NOESY spectrum of monasnaphthalenone (5)

Data:BCRC38110-E-15-3-C  
Comment:  
Description:  
Ionization Mode:ESI+  
History:Average(MS[1] 0.37..0.43)

Acquired:5/2/2018 11:18:35 AM  
Operator:AccuTOF  
m/z Calibration File:20180418-1TFANA...  
Created:5/2/2018 12:03:17 PM  
Created by:

Charge number:1 Tolerance:100.00[ppm], 5.00 .. 15.00[... Unsaturation Number:-200.0 .. 500.0 (...  
Element:<sup>12</sup>C:18 .. 18, <sup>1</sup>H:0 .. 21, <sup>10</sup>B:0 .. 0, <sup>79</sup>Br:0 .. 0, <sup>35</sup>Cl:0 .. 0, <sup>19</sup>F:0 .. 0, <sup>127</sup>I:0 .. 0, <sup>14</sup>N:0 .. 0, <sup>23</sup>Na:0 .. 1, <sup>16</sup>O:6 .. 6, ...

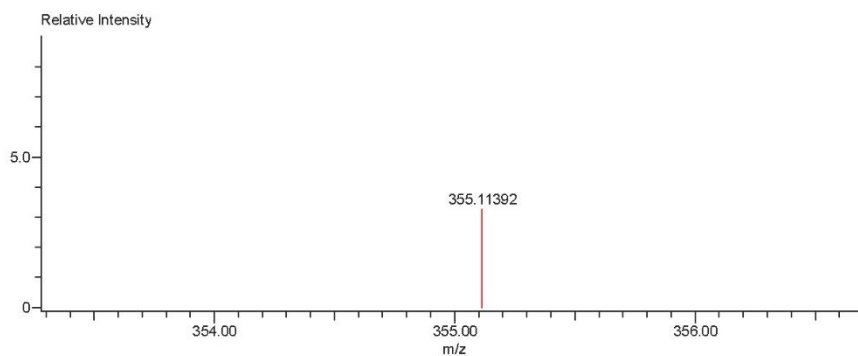

| Mass      | Intensity | Calc. Mass | Mass Difference [mDa] | Mass Difference [ppm] | Possible Formula                                                                                                      |
|-----------|-----------|------------|-----------------------|-----------------------|-----------------------------------------------------------------------------------------------------------------------|
| 355.11392 | 1183.60   | 355.11576  | -1.84                 | -5.17                 | <sup>12</sup> C <sub>18</sub> <sup>1</sup> H <sub>20</sub> <sup>23</sup> Na <sub>1</sub> <sup>16</sup> O <sub>6</sub> |

Figure S36. HRESIMS spectrum of monasnaphthalenone (5)

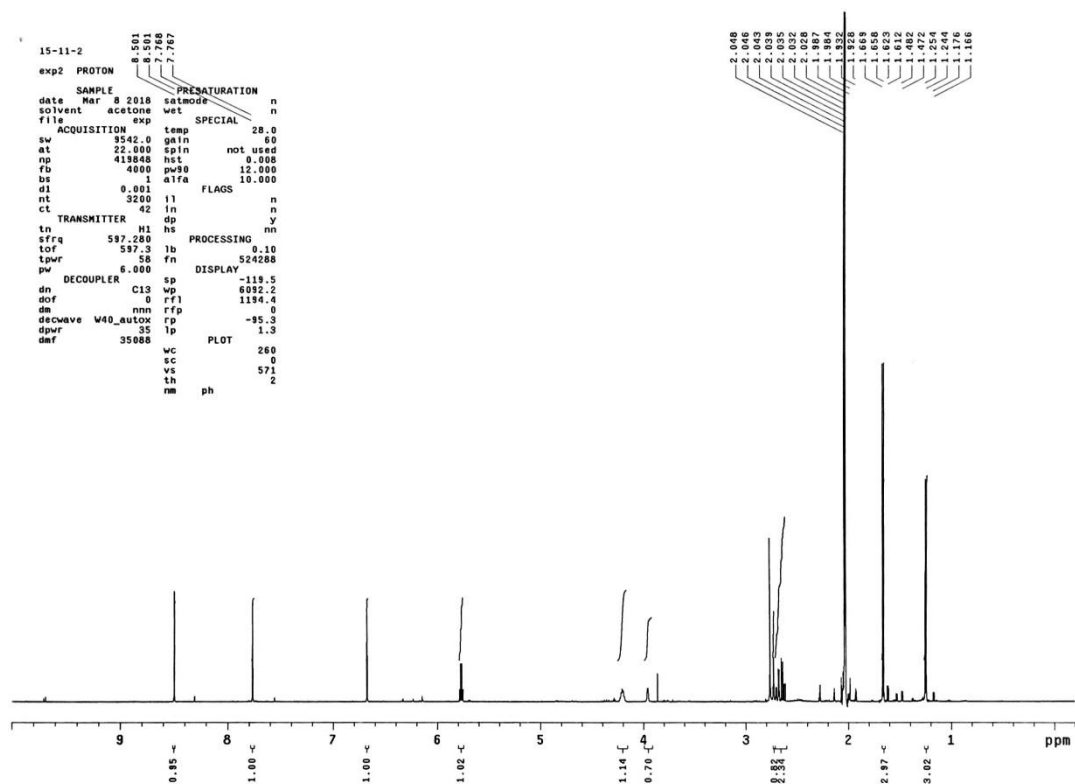

Figure S37.  $^1\text{H}$  NMR spectrum of monapurpurin (6) in acetone- $d_6$  at 600 MHz

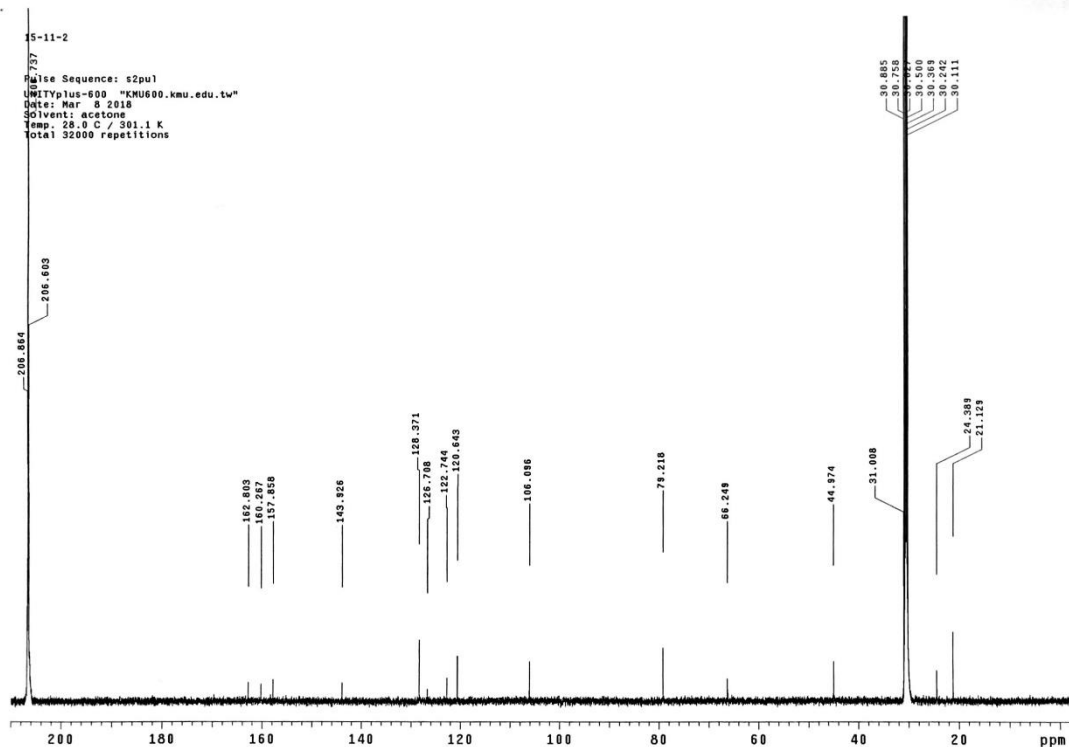

Figure S38.  $^{13}\text{C}$  NMR spectrum of monapurpurin (6) in acetone- $d_6$  at 125 MHz

15-11-2\_COSY\_acetone-d6

exp21 gCOSY

```

SAMPLE      FLAOS      nm
date May 24 2018 hs
solvent acetone sspul y
sample hsglv1 5328
ACQUISITION SPECIAL
sw 9542.0 temp 28.0
at 0.150 gain 58
np 2862 spin 0
fb 4000 F2 PROCESSING
ss 32 sb sb -0.075
d1 1.000 sbs not used
nt 18 fn 4096
2D ACQUISITION F1 PROCESSING
sw1 9542.0 sb1 -0.017
ni 160 sbs1 not used
d2 0 proc1 lp
PRESATURATION fml 4096
satmode n DISPLAY
wet n sp -1.5
TRANSMITTER H1 wp 6089.5
tn H1 sp1 -1.5
sfrq 597.280 wp1 6089.5
tof 597.3 rff 1184.9
tpwr 58 rfp 0
pw 12.000 rff1 1184.9
GRADIENTS rfp1 0
gzlvie 1444 PLOT
g1e 0.001000 wc 140.0
EDratio 1.000 sc 5.0
gstab 0.000500 wc2 140.0
DECOUPLER sc2 5.0
dn C13 vs 2343
dm nnn th 8
ai cdc av

```

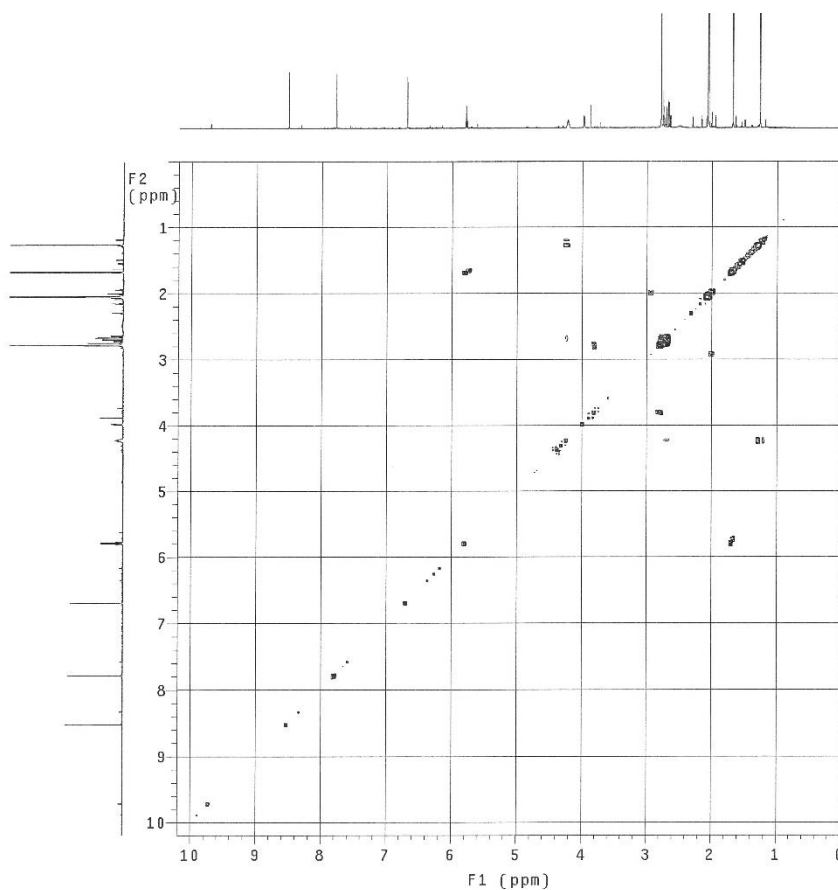

Figure S39. COSY spectrum of monapurpurin (6)

15-11-2

Pulse Sequence: gHMBCAD

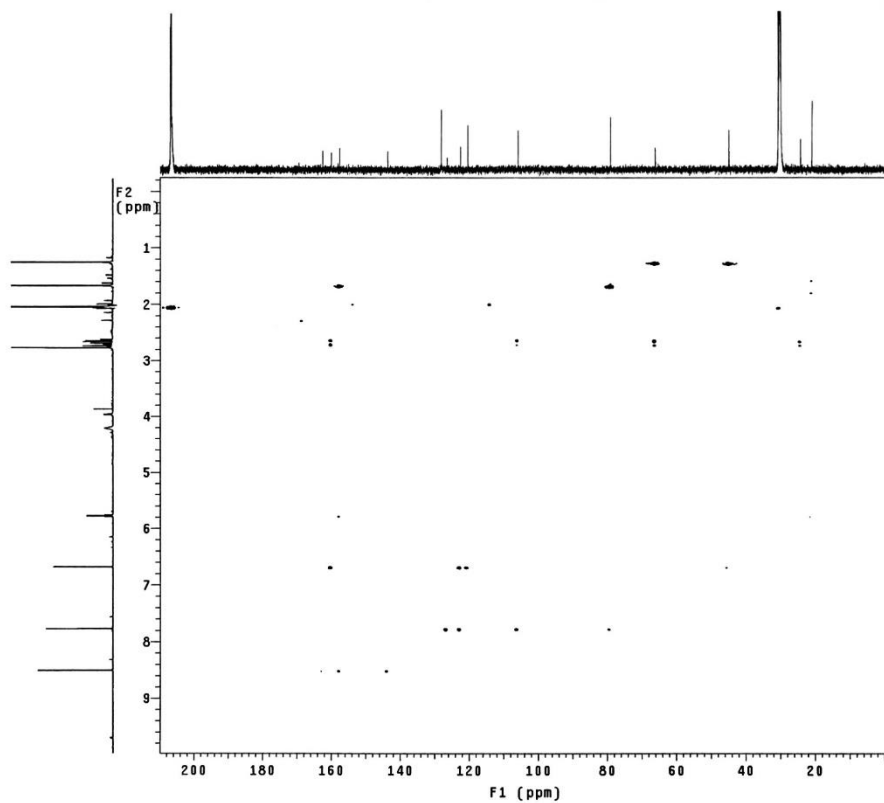

Figure S40. HMBC spectrum of monapurpurin (6)

15-11-2\_NOESY\_acetone-d6

exp22 NOESY

SAMPLE hs nn  
date May 24 2018 sspul y  
solvent acetone PFG1g  
sample Y 5328  
ACQUISITION SPECIAL  
sw 9542.0  
at 0.150 temp 28.0  
np 2862 gain 54  
fb 4000 spin 0  
ss 32 F2 PROCESSING  
d1 1.500 gf 0.069  
nt 48 gfs not used  
2D ACQUISITION fn 4096  
sw1 9542.0 F1 PROCESSING  
nt 160 gf1 0.014  
TRANSMITTER H1 gfs1 not used  
tn H1 procl lp  
sfreq 597.280 fnl 4096  
tof 597.3  
tpwr 58 sp -2.6  
pw NOESY 12.000 wp 5988.4  
mixN 0.600 wp1 5988.4  
PRESATURATION rf1 1186.0  
satmode n rfp 0  
wet n rfp1 1187.5  
dn DECOUPLER C13 rfp1 0  
dm nnn wc PLOT 140.0  
sc 5.0  
wc2 140.0  
sc2 5.0  
vs 769  
th 4  
al ph

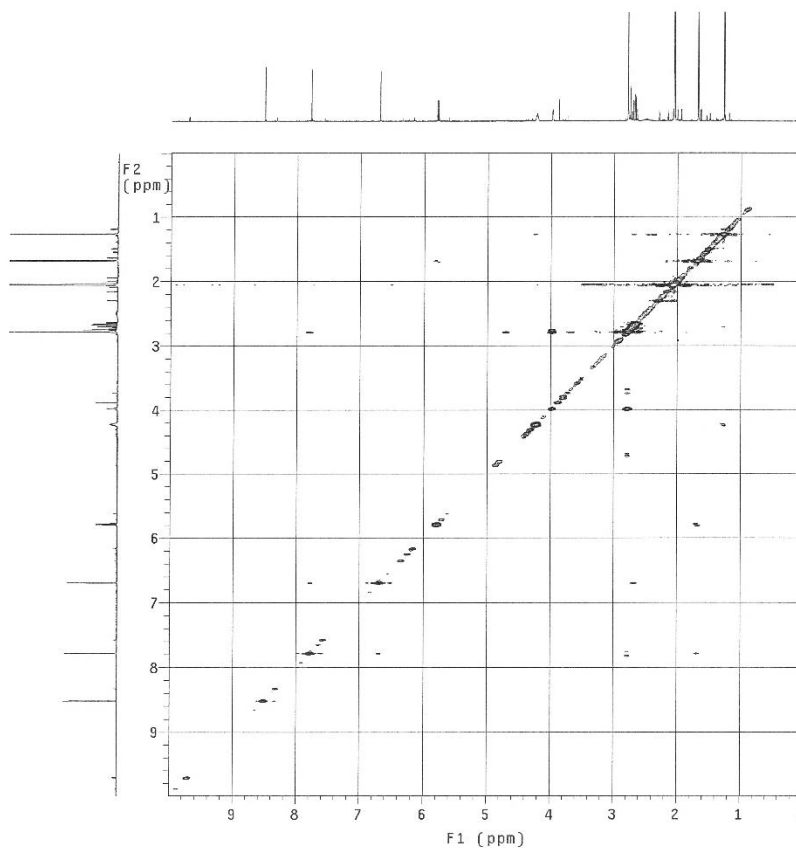

Figure S41. NOESY spectrum of monapurpurin (6)

## Mass Spectrum SmartFormula Report

### Analysis Info

Analysis Name D:\Data\7\BCRC38110E15112\_000006.d  
Method broadband first signal  
Sample Name BCRC48110-E-15-11-2  
Comment ESI Positive

3/12/2018 3:04:04 PM  
Operator: YU HSIAO-CHING  
Instrument: BRUKER FT-MS solariX

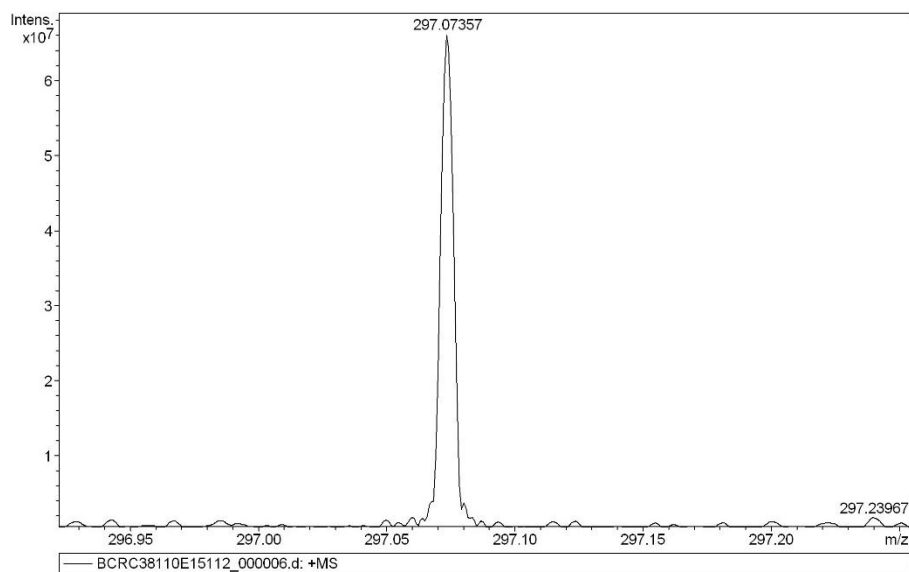

| Meas. m/z | # | Formula          | Score  | m/z       | err [mDa] | err [ppm] | mSigma | rdb | e <sup>-</sup> Conf | N-Rule |
|-----------|---|------------------|--------|-----------|-----------|-----------|--------|-----|---------------------|--------|
| 297.07357 | 1 | C 15 H 14 Na O 5 | 100.00 | 297.07334 | -0.23     | -0.76     | 16.0   | 8.5 | even                | ok     |

Figure S42. HRESIMS spectrum of monapurpurin (6)
